# Supplementary material
Source: publisher site journal article supplement (https://www.spandidos-publications.com/7375/downloadSupplementary)
Supplement: Supplementary file 1 [file downloadSupplementary]

## Sheet: SCI-Dorsal_Sham-Dorsal
Table SIII. Differentially expressed metabolites in the dorsal and ventral horns.
m/z	ID	ID-number	Compound ID	Metabolites	Class	Formula	Adduct	PPM	Ion mode	VIP	P-value	Adjusted P-value	FC	Average (SCI-Dorsal horn)	Average (Sham-Dorsal horn)
96.96965	9	9-1	HMDB0303539	Potassium acetate	Carboxylic acids and derivatives	C2H3KO2	-H	0.850142	Neg	6.15419	4.15471x10-11	2.55675x10-10	3.23693	71494.8	22087.2
174.04088	67	67-1	HMDB0247079	6-Hydroxymethylpterin	Pteridines and derivatives	C7H7N5O2	-H2O-H	1.09655	Neg	5.90472	4.78917x10-10	2.55422x10-09	2.30938	108433	46953.2
146.04580	47	47-2	HMDB0006040	N2-Methylguanine	Imidazopyrimidines	C6H7N5O	-H2O-H	2.48372	Neg	4.23792	1.78070x10-08	7.91421x10-08	3.12014	42178.5	13518.1
146.04580	47	47-1	HMDB0000897	7-Methylguanine	Imidazopyrimidines	C6H7N5O	-H2O-H	2.48372	Neg	4.23792	1.78070x10-08	7.91421x10-08	3.12014	42178.5	13518.1
132.03014	30	30-2	HMDB0000403	2-Hydroxyadenine	Imidazopyrimidines	C5H5N5O	-H2O-H	2.75481	Neg	2.60724	5.29303x10-09	2.56632x10-08	2.6979	18193.5	6743.6
132.03014	30	30-3	HMDB0000542	8-Hydroxyadenine	Imidazopyrimidines	C5H5N5O	-H2O-H	2.75481	Neg	2.60724	5.29303x10-09	2.56632x10-08	2.6979	18193.5	6743.6
132.03014	30	30-1	HMDB0000132	Guanine	Imidazopyrimidines	C5H5N5O	-H2O-H	2.75481	Neg	2.60724	5.29303x10-09	2.56632x10-08	2.6979	18193.5	6743.6
117.01946	18	18-1	HMDB0000157	Hypoxanthine	Imidazopyrimidines	C5H4N4O	-H2O-H	1.04021	Neg	2.38989	7.22150x10-11	4.27941x10-10	0.715955	17291.5	24151.7
303.08405	147	147-1	HMDB0252307	Flobufen	Organooxygen compounds	C17H14F2O3	-H	4.19357	Neg	1.65943	8.49881x10-13	6.18096x10-12	5.62695	4750.25	844.197
145.06186	46	46-1	HMDB0031642	N-Nitroso-pyrrolidine	Pyrrolidines	C4H8N2O	+FA-H	0.0425209	Neg	1.64728	1.37480x10-06	3.79255x10-06	2.34893	8138.47	3464.75
145.06186	46	46-2	HMDB0033952	Gyromitrin	Organonitrogen compounds	C4H8N2O	+FA-H	0.0425209	Neg	1.64728	1.37480x10-06	3.79255x10-06	2.34893	8138.47	3464.75
303.23286	148	148-1	HMDB0001043	FA(20:4)	Fatty Acyls	C20H32O2	-H	3.22862	Neg	1.56699	1.24063x10-09	6.40324x10-09	1.43603	19586.9	13639.6
303.23286	148	148-2	HMDB0002177	Cis-8,11,14,17-Eicosatetraenoic acid	Fatty Acyls	C20H32O2	-H	3.22862	Neg	1.56699	1.24063x10-09	6.40324x10-09	1.43603	19586.9	13639.6
303.23286	148	148-3	HMDB0006036	Mesterolone	Steroids and steroid derivatives	C20H32O2	-H	3.22862	Neg	1.56699	1.24063x10-09	6.40324x10-09	1.43603	19586.9	13639.6
303.23286	148	148-5	HMDB0036721	ent-17-Hydroxy-16beta-kauran-19-al	Prenol lipids	C20H32O2	-H	3.22862	Neg	1.56699	1.24063x10-09	6.40324x10-09	1.43603	19586.9	13639.6
303.23286	148	148-6	HMDB0036754	Yucalexin P21	Prenol lipids	C20H32O2	-H	3.22862	Neg	1.56699	1.24063x10-09	6.40324x10-09	1.43603	19586.9	13639.6
303.23286	148	148-7	HMDB0036829	Copalic acid	Prenol lipids	C20H32O2	-H	3.22862	Neg	1.56699	1.24063x10-09	6.40324x10-09	1.43603	19586.9	13639.6
303.23286	148	148-4	HMDB0036702	Sideridiol	Prenol lipids	C20H32O2	-H	3.22862	Neg	1.56699	1.24063x10-09	6.40324x10-09	1.43603	19586.9	13639.6
303.23286	148	148-9	HMDB0039687	Oryzalexin S	Prenol lipids	C20H32O2	-H	3.22862	Neg	1.56699	1.24063x10-09	6.40324x10-09	1.43603	19586.9	13639.6
303.23286	148	148-10	HMDB0039702	Oryzalexin E	Phenanthrenes and derivatives	C20H32O2	-H	3.22862	Neg	1.56699	1.24063x10-09	6.40324x10-09	1.43603	19586.9	13639.6
303.23286	148	148-8	HMDB0037824	7,13-Eperudien-15-oic acid	Prenol lipids	C20H32O2	-H	3.22862	Neg	1.56699	1.24063x10-09	6.40324x10-09	1.43603	19586.9	13639.6
116.90717	17	17-1	HMDB0251189	Dichloromethylene	Organochlorides	CCl2	+Cl	0.578225	Neg	1.54632	1.11792x10-36	1.78867x10-34	0.262475	785.202	2991.52
888.62467	247	247-1	HMDB0009311	PE(44:3)	Glycerophospholipids	C49H92NO8P	+Cl	0.244964	Neg	1.50135	1.06102x10-17	1.69763x10-16	3.69177	3626.51	982.324
888.62467	247	247-2	HMDB0114093	DMPE(42:3)	Glycerophospholipids	C49H92NO8P	+Cl	0.244964	Neg	1.50135	1.06102x10-17	1.69763x10-16	3.69177	3626.51	982.324
133.01412	32	32-3	HMDB0039790	Tetrahydro-2-methyl-3-thiophenethiol	Thiolanes	C5H10S2	-H	0.5664	Neg	1.41466	4.44720x10-08	1.73549x10-07	1.46001	19106.1	13086.3
133.01412	32	32-2	HMDB0039789	Tetrahydro-2-methyl-2-thiophenethiol	Thiolanes	C5H10S2	-H	0.5664	Neg	1.41466	4.44720x10-08	1.73549x10-07	1.46001	19106.1	13086.3
133.01412	32	32-1	HMDB0038974	3,3-Dimethyl-1,2-dithiolane	Dithiolanes	C5H10S2	-H	0.5664	Neg	1.41466	4.44720x10-08	1.73549x10-07	1.46001	19106.1	13086.3
187.04220	81	81-1	HMDB0245244	2-(3-Mercaptopropyl)pentanedioic acid	Fatty Acyls	C8H14O4S	-H2O-H	0.793175	Neg	1.40521	1.43541x10-23	4.59330x10-22	0.195943	405.247	2068.19
788.54533	213	213-1	HMDB0010163	PS(36:1)	Glycerophospholipids	C42H80NO10P	-H	2.17499	Neg	1.30539	2.71777x10-16	3.10602x10-15	2.55191	3331.14	1305.35
130.06239	29	29-1	HMDB0000064	Creatine	Carboxylic acids and derivatives	C4H9N3O2	-H	1.48196	Neg	1.25537	5.15199x10-07	1.58523x10-06	2.75863	3898.19	1413.09
130.06239	29	29-2	HMDB0013222	Beta-Guanidinopropionic acid	Organonitrogen compounds	C4H9N3O2	-H	1.48196	Neg	1.25537	5.15199x10-07	1.58523x10-06	2.75863	3898.19	1413.09
821.54722	225	225-1	HMDB0290386	SM(d17:1/22:6(5Z,7Z,10Z,13Z,16Z,19Z)-OH(4))	Unclassified	C44H77N2O7P	+FA-H	2.65932	Neg	1.16987	3.88619x10-12	2.70344x10-11	2.63884	2839.86	1076.18
821.54722	225	225-2	HMDB0290387	SM(d17:1/22:6(4Z,8Z,10Z,13Z,16Z,19Z)-OH(7))	Unclassified	C44H77N2O7P	+FA-H	2.65932	Neg	1.16987	3.88619x10-12	2.70344x10-11	2.63884	2839.86	1076.18
821.54722	225	225-3	HMDB0290388	SM(d17:1/22:6(4Z,7Z,10Z,12E,16Z,19Z)-OH(14))	Unclassified	C44H77N2O7P	+FA-H	2.65932	Neg	1.16987	3.88619x10-12	2.70344x10-11	2.63884	2839.86	1076.18
821.54722	225	225-4	HMDB0290389	SM(d17:1/22:6(4Z,7Z,10Z,13E,15E,19Z)-OH(17))	Unclassified	C44H77N2O7P	+FA-H	2.65932	Neg	1.16987	3.88619x10-12	2.70344x10-11	2.63884	2839.86	1076.18
821.54722	225	225-5	HMDB0290391	SM(d17:1/22:5(4Z,7Z,10Z,13Z,19Z)-O(16,17))	Unclassified	C44H77N2O7P	+FA-H	2.65932	Neg	1.16987	3.88619x10-12	2.70344x10-11	2.63884	2839.86	1076.18
346.05589	166	166-1	HMDB0000045	Adenosine monophosphate	Purine nucleotides	C10H14N5O7P	-H	3.36953	Neg	1.1274	2.80346x10-19	4.98392x10-18	4.20743	1870.84	444.652
346.05589	166	166-2	HMDB0001044	2'-Deoxyguanosine 5'-monophosphate	Purine nucleotides	C10H14N5O7P	-H	3.36953	Neg	1.1274	2.80346x10-19	4.98392x10-18	4.20743	1870.84	444.652
346.05589	166	166-3	HMDB0003540	3'-AMP	Ribonucleoside 3'-phosphates	C10H14N5O7P	-H	3.36953	Neg	1.1274	2.80346x10-19	4.98392x10-18	4.20743	1870.84	444.652
147.02982	49	49-4	HMDB0303135	trans-Propenyl propyl disulfide	Organic disulfides	C6H12S2	-H	0.847068	Neg	1.10632	3.95778x10-14	3.33286x10-13	2.25814	3140.91	1390.92
147.02982	49	49-2	HMDB0038890	Methyl 3-methyl-1-butenyl disulfide	Organic disulfides	C6H12S2	-H	0.847068	Neg	1.10632	3.95778x10-14	3.33286x10-13	2.25814	3140.91	1390.92
147.02982	49	49-3	HMDB0041392	1-Propenyl propyl disulfide	Organic disulfides	C6H12S2	-H	0.847068	Neg	1.10632	3.95778x10-14	3.33286x10-13	2.25814	3140.91	1390.92
147.02982	49	49-1	HMDB0033912	2-Propenyl propyl disulfide	Allyl sulfur compounds	C6H12S2	-H	0.847068	Neg	1.10632	3.95778x10-14	3.33286x10-13	2.25814	3140.91	1390.92
225.06185	105	105-2	HMDB0245740	N-(2,4-Dinitrophenyl)ethylenediamine	Benzene and substituted derivatives	C8H10N4O4	-H	0.0867454	Neg	1.09879	2.04463x10-05	4.65024x10-05	2.68936	3322.03	1235.25
225.06185	105	105-1	HMDB0011105	5-Acetylamino-6-formylamino-3-methyluracil	Diazines	C8H10N4O4	-H	0.0867454	Neg	1.09879	2.04463x10-05	4.65024x10-05	2.68936	3322.03	1235.25
255.23343	125	125-1	HMDB0031082	1-Pentadecene	Unsaturated hydrocarbons	C15H30	+FA-H	1.87763	Neg	1.09232	2.30963x10-08	9.98760x10-08	1.28692	11614.3	9024.94
255.23343	125	125-2	HMDB0031083	(E)-7-Pentadecene	Unsaturated hydrocarbons	C15H30	+FA-H	1.87763	Neg	1.09232	2.30963x10-08	9.98760x10-08	1.28692	11614.3	9024.94
885.54946	244	244-1	HMDB0009793	PI(38:4)	Glycerophospholipids	C47H83O13P	-H	0.703671	Neg	1.09154	1.54729x10-22	4.12611x10-21	2.33161	2335.99	1001.88
890.63789	249	249-1	HMDB0000024	3-O-Sulfogalactosylceramide (d18:1/24:0)	Phenols	C48H93NO11S	-H	0.830668	Neg	1.06907	1.34432x10-16	1.65455x10-15	4.01179	1862.14	464.168
124.00728	23	23-1	HMDB0000251	Taurine	Organic sulfonic acids and derivatives	C2H7NO3S	-H	0.895838	Neg	1.06742	7.31327x10-04	1.34497x10-03	1.73086	5568.33	3217.08
211.99662	96	96-1	HMDB0012250	L-Aspartyl-4-phosphate	Carboxylic acids and derivatives	C4H8NO7P	-H	0.257407	Neg	1.02368	1.26133x10-26	6.72711x10-25	2.26094	2249.78	995.061
171.00631	64	64-1	HMDB0012228	Ethylphosphate	Organic phosphoric acids and derivatives	C2H7O4P	+FA-H	0.5196	Neg	1.01719	5.14517x10-08	1.96006x10-07	8.09948	2050.54	253.169
104.10711	28	28-1	HMDB0244984	2-Amino-3-methyl-1-butanol	Organonitrogen compounds	C5H13NO	+H	1.08344	Pos	19.5318	1.53922x10-28	1.37889x10-26	1.56604	874114	558167
317.11371	728	728-4	HMDB0041516	Avenanthramide G	Cinnamic acids and derivatives	C16H13NO5	+NH4	1.43951	Pos	10.2498	2.00060x10-11	2.94608x10-10	1.19768	772108	644669
317.11371	728	728-3	HMDB0041141	Marshdine	Quinolines and derivatives	C16H13NO5	+NH4	1.43951	Pos	10.2498	2.00060x10-11	2.94608x10-10	1.19768	772108	644669
317.11371	728	728-2	HMDB0038577	(Z)-N-Coumaroyl-5-hydroxyanthranilic acid	Cinnamic acids and derivatives	C16H13NO5	+NH4	1.43951	Pos	10.2498	2.00060x10-11	2.94608x10-10	1.19768	772108	644669
317.11371	728	728-1	HMDB0029284	Avenanthramide 1c	Cinnamic acids and derivatives	C16H13NO5	+NH4	1.43951	Pos	10.2498	2.00060x10-11	2.94608x10-10	1.19768	772108	644669
207.07794	333	333-1	HMDB0249075	Benzyl phenyl ether	Phenol ethers	C13H12O	+Na	0.67194	Pos	7.22599	1.43927x10-47	1.54721x10-44	1.82069	82999.6	45586.8
154.05819	149	149-1	HMDB0000064	Creatine	Carboxylic acids and derivatives	C4H9N3O2	+Na	3.30462	Pos	6.83143	3.11998x10-42	1.67699x10-39	1.42357	116477	81820.5
154.05819	149	149-2	HMDB0013222	Beta-Guanidinopropionic acid	Organonitrogen compounds	C4H9N3O2	+Na	3.30462	Pos	6.83143	3.11998x10-42	1.67699x10-39	1.42357	116477	81820.5
170.03260	199	199-1	HMDB0000064	Creatine	Carboxylic acids and derivatives	C4H9N3O2	+K	0.207655	Pos	6.11538	7.55994x10-22	4.06347x10-20	1.36928	127257	92937.5
170.03260	199	199-2	HMDB0013222	Beta-Guanidinopropionic acid	Organonitrogen compounds	C4H9N3O2	+K	0.207655	Pos	6.11538	7.55994x10-22	4.06347x10-20	1.36928	127257	92937.5
132.07641	81	81-2	HMDB0003646	N-Methylhydantoin	Azolines	C4H6N2O2	+NH4	2.73067	Pos	6.02514	2.99518x10-16	9.19947x10-15	1.24416	189246	152107
132.07641	81	81-1	HMDB0000076	Dihydrouracil	Diazines	C4H6N2O2	+NH4	2.73067	Pos	6.02514	2.99518x10-16	9.19947x10-15	1.24416	189246	152107
318.11732	730	730-1	HMDB0255287	N(6),O(2)-Dimethyladenosine	Purine nucleosides	C12H17N5O4	+Na	0.0224615	Pos	4.08004	2.03853x10-10	2.45720x10-09	1.18806	133616	112465
318.11732	730	730-2	HMDB0255293	N2-Ethyl-2'-deoxyguanosine	Purine nucleosides	C12H17N5O4	+Na	0.0224615	Pos	4.08004	2.03853x10-10	2.45720x10-09	1.18806	133616	112465
145.02576	114	114-1	HMDB0303720	Sodium benzoate	Benzene and substituted derivatives	C7H5NaO2	+H	1.69278	Pos	3.76623	2.77029x10-19	1.24086x10-17	1.2823	61008.9	47577.6
104.07068	26	26-7	HMDB0002299	(R)-beta-Aminoisobutyric acid	Carboxylic acids and derivatives	C4H9NO2	+H	0.579005	Pos	3.46882	1.22229x10-10	1.56424x10-09	1.22434	82135.1	67085.4
104.07068	26	26-6	HMDB0002166	(S)-beta-Aminoisobutyric acid	Carboxylic acids and derivatives	C4H9NO2	+H	0.579005	Pos	3.46882	1.22229x10-10	1.56424x10-09	1.22434	82135.1	67085.4
104.07068	26	26-4	HMDB0000650	D-alpha-Aminobutyric acid	Carboxylic acids and derivatives	C4H9NO2	+H	0.579005	Pos	3.46882	1.22229x10-10	1.56424x10-09	1.22434	82135.1	67085.4
104.07068	26	26-2	HMDB0000112	gamma-Aminobutyric acid	Carboxylic acids and derivatives	C4H9NO2	+H	0.579005	Pos	3.46882	1.22229x10-10	1.56424x10-09	1.22434	82135.1	67085.4
104.07068	26	26-5	HMDB0001906	2-Aminoisobutyric acid	Carboxylic acids and derivatives	C4H9NO2	+H	0.579005	Pos	3.46882	1.22229x10-10	1.56424x10-09	1.22434	82135.1	67085.4
104.07068	26	26-9	HMDB0031329	Butyl nitrite	Organonitrogen compounds	C4H9NO2	+H	0.579005	Pos	3.46882	1.22229x10-10	1.56424x10-09	1.22434	82135.1	67085.4
104.07068	26	26-8	HMDB0003911	3-Aminoisobutanoic acid	Carboxylic acids and derivatives	C4H9NO2	+H	0.579005	Pos	3.46882	1.22229x10-10	1.56424x10-09	1.22434	82135.1	67085.4
104.07068	26	26-11	HMDB0041945	N-Ethylglycine	Carboxylic acids and derivatives	C4H9NO2	+H	0.579005	Pos	3.46882	1.22229x10-10	1.56424x10-09	1.22434	82135.1	67085.4
104.07068	26	26-10	HMDB0031654	3-Aminobutanoic acid	Carboxylic acids and derivatives	C4H9NO2	+H	0.579005	Pos	3.46882	1.22229x10-10	1.56424x10-09	1.22434	82135.1	67085.4
104.07068	26	26-1	HMDB0000092	Dimethylglycine	Carboxylic acids and derivatives	C4H9NO2	+H	0.579005	Pos	3.46882	1.22229x10-10	1.56424x10-09	1.22434	82135.1	67085.4
104.07068	26	26-3	HMDB0000452	L-alpha-Aminobutyric acid	Carboxylic acids and derivatives	C4H9NO2	+H	0.579005	Pos	3.46882	1.22229x10-10	1.56424x10-09	1.22434	82135.1	67085.4
189.05176	265	265-1	HMDB0244601	2-(Sec-butyldisulfanyl)-1h-imidazole	Azoles	C7H12N2S2	+H	1.48533	Pos	3.27268	1.20160x10-12	2.43720x10-11	1.24525	62361	50079.2
213.05178	361	361-4	HMDB0040731	Avenalumic acid	Benzene and substituted derivatives	C11H10O3	+Na	2.31491	Pos	3.13177	3.91069x10-16	1.16778x10-14	1.28404	46098.6	35901.2
213.05178	361	361-6	HMDB0041122	(S)-2,3-Dihydro-5-hydroxy-2-methyl-1,4-naphthoquinone	Naphthalenes	C11H10O3	+Na	2.31491	Pos	3.13177	3.91069x10-16	1.16778x10-14	1.28404	46098.6	35901.2
213.05178	361	361-5	HMDB0040938	Coixinden A	Indenes and isoindenes	C11H10O3	+Na	2.31491	Pos	3.13177	3.91069x10-16	1.16778x10-14	1.28404	46098.6	35901.2
213.05178	361	361-1	HMDB0032991	7-Methoxy-6-methyl-2H-1-benzopyran-2-one	Coumarins and derivatives	C11H10O3	+Na	2.31491	Pos	3.13177	3.91069x10-16	1.16778x10-14	1.28404	46098.6	35901.2
213.05178	361	361-2	HMDB0039359	Methyl (Z,Z)-10-hydroxy-2,8-decadiene-4,6-diynoate	Fatty Acyls	C11H10O3	+Na	2.31491	Pos	3.13177	3.91069x10-16	1.16778x10-14	1.28404	46098.6	35901.2
213.05178	361	361-3	HMDB0040326	7-Hydroxy-2,5-dimethyl-4H-1-benzopyran-4-one	Benzopyrans	C11H10O3	+Na	2.31491	Pos	3.13177	3.91069x10-16	1.16778x10-14	1.28404	46098.6	35901.2
213.05178	361	361-7	HMDB0247248	7-Ethoxycoumarin	Coumarins and derivatives	C11H10O3	+Na	2.31491	Pos	3.13177	3.91069x10-16	1.16778x10-14	1.28404	46098.6	35901.2
255.06258	525	525-5	HMDB0255452	Naphthoxylactic acid	Naphthalenes	C13H12O4	+Na	0.930018	Pos	3.13092	5.67043x10-06	3.37242x10-05	1.13223	145522	128527
255.06258	525	525-2	HMDB0033330	Dihydrocoriandrin	Benzopyrans	C13H12O4	+Na	0.930018	Pos	3.13092	5.67043x10-06	3.37242x10-05	1.13223	145522	128527
255.06258	525	525-3	HMDB0038911	(2S,3S,4S)-5,7,9,11-Tridecatetrayne-1,2,3,4-tetrol	Fatty Acyls	C13H12O4	+Na	0.930018	Pos	3.13092	5.67043x10-06	3.37242x10-05	1.13223	145522	128527
255.06258	525	525-4	HMDB0041325	Salfredin B11	Benzopyrans	C13H12O4	+Na	0.930018	Pos	3.13092	5.67043x10-06	3.37242x10-05	1.13223	145522	128527
255.06258	525	525-1	HMDB0030813	Cassiachromone	Benzopyrans	C13H12O4	+Na	0.930018	Pos	3.13092	5.67043x10-06	3.37242x10-05	1.13223	145522	128527
233.07845	440	440-1	HMDB0013070	Sinapyl alcohol	Phenols	C11H14O4	+Na	0.129898	Pos	2.88687	3.73113x10-25	2.68189x10-23	1.36821	26973.2	19714.3
127.02671	71	71-2	HMDB0252088	Ethylurea	Organic carbonic acids and derivatives	C3H8N2O	+K	0.840775	Pos	2.86751	2.25952x10-17	8.37580x10-16	1.25952	39835.1	31627.2
127.02671	71	71-3	HMDB0253863	L-alaninamide	Carboxylic acids and derivatives	C3H8N2O	+K	0.840775	Pos	2.86751	2.25952x10-17	8.37580x10-16	1.25952	39835.1	31627.2
127.02671	71	71-1	HMDB0244027	1,1-Dimethylurea	Organic carbonic acids and derivatives	C3H8N2O	+K	0.840775	Pos	2.86751	2.25952x10-17	8.37580x10-16	1.25952	39835.1	31627.2
319.11239	733	733-2	HMDB0245678	4-Nitrophenyl beta-D-glucopyranoside	Organooxygen compounds	C12H15NO8	+NH4	3.90983	Pos	2.72267	2.49366x10-11	3.57425x10-10	1.21093	51964.7	42913.1
319.11239	733	733-1	HMDB0244855	2-Nitrophenyl a-D-galactopyranoside	Organooxygen compounds	C12H15NO8	+NH4	3.90983	Pos	2.72267	2.49366x10-11	3.57425x10-10	1.21093	51964.7	42913.1
193.06222	280	280-1	HMDB0032412	Methyl beta-naphthyl ketone	Naphthalenes	C12H10O	+Na	1.07173	Pos	2.68838	9.52500x10-33	1.46277x10-30	1.93972	11864.8	6116.75
193.06222	280	280-2	HMDB0032582	2-Biphenylol	Benzene and substituted derivatives	C12H10O	+Na	1.07173	Pos	2.68838	9.52500x10-33	1.46277x10-30	1.93972	11864.8	6116.75
193.06222	280	280-3	HMDB0034446	Diphenyl ether	Benzene and substituted derivatives	C12H10O	+Na	1.07173	Pos	2.68838	9.52500x10-33	1.46277x10-30	1.93972	11864.8	6116.75
162.11244	172	172-2	HMDB0254990	N-(2-Hydroxyethyl)valine	Carboxylic acids and derivatives	C7H15NO3	+H	0.200889	Pos	2.51089	2.90061x10-10	3.35286x10-09	0.758644	25770.3	33968.9
162.11244	172	172-1	HMDB0244982	beta-Hydroxy-gamma-trimethylaminobutyric acid	Carboxylic acids and derivatives	C7H15NO3	+H	0.200889	Pos	2.51089	2.90061x10-10	3.35286x10-09	0.758644	25770.3	33968.9
175.00159	218	218-1	HMDB0000157	Hypoxanthine	Imidazopyrimidines	C5H4N4O	+K	0.653431	Pos	2.40798	1.37862x10-31	1.64669x10-29	1.76678	10799	6112.23
169.05803	195	195-1	HMDB0006899	Alanylglycine	Carboxylic acids and derivatives	C5H10N2O3	+Na	1.97238	Pos	2.37177	5.41095x10-25	3.63548x10-23	1.26307	23469.6	18581.3
177.08838	228	228-1	HMDB0244259	1,N6-Ethenoadenine	Imidazopyrimidines	C7H5N5	+NH4	0.248177	Pos	2.21388	8.58885x10-38	2.30825x10-35	2.09073	7159.89	3424.59
208.08133	338	338-1	HMDB0240294	2-O-Methylascorbic acid	Dihydrofurans	C7H10O6	+NH4	1.12815	Pos	2.18546	9.31121x10-35	1.66826x10-32	1.73756	8746.83	5033.97
175.11891	220	220-2	HMDB0003416	D-Arginine	Carboxylic acids and derivatives	C6H14N4O2	+H	0.405184	Pos	2.16917	1.13125x10-17	4.50407x10-16	1.45586	14940.7	10262.5
175.11891	220	220-1	HMDB0000517	L-Arginine	Carboxylic acids and derivatives	C6H14N4O2	+H	0.405184	Pos	2.16917	1.13125x10-17	4.50407x10-16	1.45586	14940.7	10262.5
159.02729	164	164-1	HMDB0031160	1-Pentanesulfenothioic acid	Sulfenyl compounds	C5H12S2	+Na	0.191179	Pos	2.14341	8.51047x10-41	3.04958x10-38	1.83537	7640.8	4163.08
185.03226	253	253-4	HMDB0006899	Alanylglycine	Carboxylic acids and derivatives	C5H10N2O3	+K	0.341453	Pos	2.00249	3.86382x10-22	2.18611x10-20	1.27213	17075.7	13422.9
185.03226	253	253-2	HMDB0002031	Ureidoisobutyric acid	Organic carbonic acids and derivatives	C5H10N2O3	+K	0.341453	Pos	2.00249	3.86382x10-22	2.18611x10-20	1.27213	17075.7	13422.9
185.03226	253	253-3	HMDB0003423	D-Glutamine	Carboxylic acids and derivatives	C5H10N2O3	+K	0.341453	Pos	2.00249	3.86382x10-22	2.18611x10-20	1.27213	17075.7	13422.9
185.03226	253	253-1	HMDB0000641	L-Glutamine	Carboxylic acids and derivatives	C5H10N2O3	+K	0.341453	Pos	2.00249	3.86382x10-22	2.18611x10-20	1.27213	17075.7	13422.9
233.02025	439	439-1	HMDB0256496	Phosphovanillin	Organic phosphoric acids and derivatives	C8H9O6P	+H	3.21657	Pos	1.9396	1.36779x10-17	5.25132x10-16	1.35944	14002	10299.8
150.97666	130	130-1	HMDB0304825	Sodium lactate	Carboxylic acids and derivatives	C3H5NaO3	+K	0.925971	Pos	1.92519	5.00236x10-21	2.33806x10-19	1.36568	12792.6	9367.19
165.08826	183	183-5	HMDB0031343	Methyl cyclohexanecarboxylate	Carboxylic acids and derivatives	C8H14O2	+Na	2.20751	Pos	1.87014	3.56927x10-32	4.79621x10-30	1.92994	5853.95	3033.24
165.08826	183	183-6	HMDB0040215	cis-3-Hexenyl acetate	Carboxylic acids and derivatives	C8H14O2	+Na	2.20751	Pos	1.87014	3.56927x10-32	4.79621x10-30	1.92994	5853.95	3033.24
165.08826	183	183-4	HMDB0031293	2,3-Octanedione	Organooxygen compounds	C8H14O2	+Na	2.20751	Pos	1.87014	3.56927x10-32	4.79621x10-30	1.92994	5853.95	3033.24
165.08826	183	183-2	HMDB0013902	2-ene-Valproic acid	Fatty Acyls	C8H14O2	+Na	2.20751	Pos	1.87014	3.56927x10-32	4.79621x10-30	1.92994	5853.95	3033.24
165.08826	183	183-3	HMDB0013903	(3Z)-2-Propylpent-3-enoic acid	Fatty Acyls	C8H14O2	+Na	2.20751	Pos	1.87014	3.56927x10-32	4.79621x10-30	1.92994	5853.95	3033.24
165.08826	183	183-1	HMDB0013897	4-ene-Valproic acid	Fatty Acyls	C8H14O2	+Na	2.20751	Pos	1.87014	3.56927x10-32	4.79621x10-30	1.92994	5853.95	3033.24
199.03630	302	302-3	HMDB0032883	1,4,5-Naphthalenetriol	Naphthalenes	C10H8O3	+Na	1.5699	Pos	1.86484	1.04244x10-14	2.60611x10-13	1.30623	15983.1	12236
199.03630	302	302-1	HMDB0029758	Herniarin	Coumarins and derivatives	C10H8O3	+Na	1.5699	Pos	1.86484	1.04244x10-14	2.60611x10-13	1.30623	15983.1	12236
199.03630	302	302-6	HMDB0059622	4-Methylumbelliferone	Coumarins and derivatives	C10H8O3	+Na	1.5699	Pos	1.86484	1.04244x10-14	2.60611x10-13	1.30623	15983.1	12236
199.03630	302	302-8	HMDB0303033	8-Methoxycoumarin	Coumarins and derivatives	C10H8O3	+Na	1.5699	Pos	1.86484	1.04244x10-14	2.60611x10-13	1.30623	15983.1	12236
199.03630	302	302-7	HMDB0251931	Erythrocentaurin	Benzopyrans	C10H8O3	+Na	1.5699	Pos	1.86484	1.04244x10-14	2.60611x10-13	1.30623	15983.1	12236
199.03630	302	302-5	HMDB0033813	3-(3,4-Methylenedioxyphenyl)propenal	Benzodioxoles	C10H8O3	+Na	1.5699	Pos	1.86484	1.04244x10-14	2.60611x10-13	1.30623	15983.1	12236
199.03630	302	302-2	HMDB0031054	10-Hydroxy-2,8-decadiene-4,6-diynoic acid	Fatty Acyls	C10H8O3	+Na	1.5699	Pos	1.86484	1.04244x10-14	2.60611x10-13	1.30623	15983.1	12236
199.03630	302	302-4	HMDB0032990	7-Hydroxy-6-methyl-2H-1-benzopyran-2-one	Coumarins and derivatives	C10H8O3	+Na	1.5699	Pos	1.86484	1.04244x10-14	2.60611x10-13	1.30623	15983.1	12236
156.04200	155	155-3	HMDB0032390	2-Methyl-4,5-benzoxazole	Benzoxazoles	C8H7NO	+Na	0.0104503	Pos	1.85926	4.93972x10-10	5.53146x10-09	0.714688	11403.5	15955.9
156.04200	155	155-1	HMDB0004094	Indoxyl	Indoles and derivatives	C8H7NO	+Na	0.0104503	Pos	1.85926	4.93972x10-10	5.53146x10-09	0.714688	11403.5	15955.9
156.04200	155	155-2	HMDB0029757	4-Hydroxybenzeneacetonitrile	Benzene and substituted derivatives	C8H7NO	+Na	0.0104503	Pos	1.85926	4.93972x10-10	5.53146x10-09	0.714688	11403.5	15955.9
217.04689	375	375-1	HMDB0000954	Ferulic acid	Cinnamic acids and derivatives	C10H10O4	+Na	1.0955	Pos	1.76576	7.77716x10-14	1.70621x10-12	1.29815	14668.8	11299.8
225.08804	413	413-1	HMDB0030816	6-Acetyl-2,2-dimethyl-2H-1-benzopyran	Benzopyrans	C13H14O2	+Na	2.67043	Pos	1.75225	1.33656x10-16	4.49000x10-15	1.31348	13183.9	10037.4
225.08804	413	413-3	HMDB0259119	Tremetone	Benzene and substituted derivatives	C13H14O2	+Na	2.67043	Pos	1.75225	1.33656x10-16	4.49000x10-15	1.31348	13183.9	10037.4
225.08804	413	413-2	HMDB0031663	3-(3-Methylbutylidene)-1(3H)-isobenzofuranone	Isocoumarans	C13H14O2	+Na	2.67043	Pos	1.75225	1.33656x10-16	4.49000x10-15	1.31348	13183.9	10037.4
112.01585	40	40-1	HMDB0240707	Aminomethylphosphonic acid	Organic phosphonic acids and derivatives	CH6NO3P	+H	0.312948	Pos	1.71407	1.00614x10-09	1.09252x10-08	1.21235	21915.4	18076.8
291.06911	665	665-1	HMDB0041988	Pinazepam	Benzodiazepines	C18H13ClN2O	+H-H2O	1.17043	Pos	1.70672	3.74218x10-25	2.68189x10-23	1.47779	7936.08	5370.24
307.04358	705	705-3	HMDB0003040	Arabinosylhypoxanthine	Purine nucleosides	C10H12N4O5	+K	1.23555	Pos	1.69337	2.22092x10-22	1.32638x10-20	1.40967	9042.36	6414.54
307.04358	705	705-1	HMDB0000195	Inosine	Purine nucleosides	C10H12N4O5	+K	1.23555	Pos	1.69337	2.22092x10-22	1.32638x10-20	1.40967	9042.36	6414.54
307.04358	705	705-2	HMDB0000481	Allopurinol riboside	Pyrazolo[3,4-d]pyrimidine glycosides	C10H12N4O5	+K	1.23555	Pos	1.69337	2.22092x10-22	1.32638x10-20	1.40967	9042.36	6414.54
152.04708	137	137-1	HMDB0011664	3-Methylene-indolenine	Indoles and derivatives	C9H7N	+Na	0.108434	Pos	1.68061	1.68603x10-18	6.97109x10-17	1.3832	9823.35	7101.89
136.04779	91	91-1	HMDB0000562	Creatinine	Carboxylic acids and derivatives	C4H7N3O	+Na	2.75698	Pos	1.67644	1.40852x10-18	6.05662x10-17	1.29049	12027.8	9320.35
181.06213	241	241-3	HMDB0060322	1-Hydroxymethylnaphthalene	Naphthalenes	C11H10O	+Na	1.38607	Pos	1.67168	1.88514x10-26	1.55886x10-24	1.55905	6610.32	4239.95
181.06213	241	241-2	HMDB0060303	(2-Naphthyl)methanol	Naphthalenes	C11H10O	+Na	1.38607	Pos	1.67168	1.88514x10-26	1.55886x10-24	1.55905	6610.32	4239.95
181.06213	241	241-1	HMDB0032861	2-Methoxynaphthalene	Naphthalenes	C11H10O	+Na	1.38607	Pos	1.67168	1.88514x10-26	1.55886x10-24	1.55905	6610.32	4239.95
241.12874	474	474-1	HMDB0259216	Triglycerol	Glycerolipids	C9H20O7	+H	2.07727	Pos	1.66933	7.19622x10-25	4.55055x10-23	1.56137	6779.67	4342.14
207.01376	330	330-1	HMDB0245962	3-Oxalomalic acid	Carboxylic acids and derivatives	C6H6O8	+H	1.05716	Pos	1.65132	3.76592x10-29	4.04836x10-27	1.80865	4980.76	2753.86
223.07257	400	400-5	HMDB0244965	2-[Hydroxy(phenyl)methyl]phenol	Benzene and substituted derivatives	C13H12O2	+Na	1.94732	Pos	1.64117	6.80176x10-14	1.52331x10-12	1.33508	11680.3	8748.72
223.07257	400	400-2	HMDB0030646	(Z)-3-(1-Butenyl)-1H-2-benzopyran-1-one	Isocoumarins and derivatives	C13H12O2	+Na	1.94732	Pos	1.64117	6.80176x10-14	1.52331x10-12	1.33508	11680.3	8748.72
223.07257	400	400-7	HMDB0245676	1-(4-Methoxy-1-naphthyl)ethanone	Naphthalenes	C13H12O2	+Na	1.94732	Pos	1.64117	6.80176x10-14	1.52331x10-12	1.33508	11680.3	8748.72
223.07257	400	400-6	HMDB0245357	2,2'-Methylenediphenol	Benzene and substituted derivatives	C13H12O2	+Na	1.94732	Pos	1.64117	6.80176x10-14	1.52331x10-12	1.33508	11680.3	8748.72
223.07257	400	400-11	HMDB0303824	(7E)-4-Deoxy-2,3-dihydromycosinol	Organooxygen compounds	C13H12O2	+Na	1.94732	Pos	1.64117	6.80176x10-14	1.52331x10-12	1.33508	11680.3	8748.72
223.07257	400	400-4	HMDB0240711	Bisphenol F	Benzene and substituted derivatives	C13H12O2	+Na	1.94732	Pos	1.64117	6.80176x10-14	1.52331x10-12	1.33508	11680.3	8748.72
223.07257	400	400-8	HMDB0245967	(3-Phenoxyphenyl)methanol	Benzene and substituted derivatives	C13H12O2	+Na	1.94732	Pos	1.64117	6.80176x10-14	1.52331x10-12	1.33508	11680.3	8748.72
223.07257	400	400-10	HMDB0302506	4-Deoxy-2,3-dihydromycosinol	Organooxygen compounds	C13H12O2	+Na	1.94732	Pos	1.64117	6.80176x10-14	1.52331x10-12	1.33508	11680.3	8748.72
223.07257	400	400-3	HMDB0036460	Safynol	Fatty Acyls	C13H12O2	+Na	1.94732	Pos	1.64117	6.80176x10-14	1.52331x10-12	1.33508	11680.3	8748.72
223.07257	400	400-9	HMDB0250959	Dehydrotremetone	Benzofurans	C13H12O2	+Na	1.94732	Pos	1.64117	6.80176x10-14	1.52331x10-12	1.33508	11680.3	8748.72
223.07257	400	400-1	HMDB0014738	Monobenzone	Phenols	C13H12O2	+Na	1.94732	Pos	1.64117	6.80176x10-14	1.52331x10-12	1.33508	11680.3	8748.72
241.08280	472	472-3	HMDB0256835	Propranolol glycol	Naphthalenes	C13H14O3	+Na	3.24189	Pos	1.55499	5.37512x10-15	1.40933x10-13	1.3439	10061.1	7486.46
241.08280	472	472-2	HMDB0250015	(S,E)-2-(5-Hydroxy-8,9-dihydro-5H-benzo[7]annulen-6(7H)-ylidene)acetic acid	Unclassified	C13H14O3	+Na	3.24189	Pos	1.55499	5.37512x10-15	1.40933x10-13	1.3439	10061.1	7486.46
241.08280	472	472-1	HMDB0040358	(R)-Bitalin A	Benzene and substituted derivatives	C13H14O3	+Na	3.24189	Pos	1.55499	5.37512x10-15	1.40933x10-13	1.3439	10061.1	7486.46
161.12819	171	171-1	HMDB0004827	Proline betaine	Carboxylic acids and derivatives	C7H13NO2	+NH4	1.63546	Pos	1.55143	1.61009x10-35	3.46170x10-33	3.83922	2517.38	655.702
253.11914	519	519-2	HMDB0013941	Epoxy-hexobarbital	Diazines	C12H16N2O4	+H	3.21068	Pos	1.54234	1.51389x10-12	2.85515x10-11	1.26403	12888.3	10196.2
253.11914	519	519-1	HMDB0013940	3'-Hydroxyhexobarbital	Diazines	C12H16N2O4	+H	3.21068	Pos	1.54234	1.51389x10-12	2.85515x10-11	1.26403	12888.3	10196.2
253.11914	519	519-4	HMDB0029004	Phenylalanylserine	Carboxylic acids and derivatives	C12H16N2O4	+H	3.21068	Pos	1.54234	1.51389x10-12	2.85515x10-11	1.26403	12888.3	10196.2
253.11914	519	519-5	HMDB0029046	Serylphenylalanine	Carboxylic acids and derivatives	C12H16N2O4	+H	3.21068	Pos	1.54234	1.51389x10-12	2.85515x10-11	1.26403	12888.3	10196.2
253.11914	519	519-6	HMDB0029098	Tyrosyl-Alanine	Carboxylic acids and derivatives	C12H16N2O4	+H	3.21068	Pos	1.54234	1.51389x10-12	2.85515x10-11	1.26403	12888.3	10196.2
253.11914	519	519-3	HMDB0028699	Alanyltyrosine	Carboxylic acids and derivatives	C12H16N2O4	+H	3.21068	Pos	1.54234	1.51389x10-12	2.85515x10-11	1.26403	12888.3	10196.2
146.16487	118	118-1	HMDB0001257	Spermidine	Organonitrogen compounds	C7H19N3	+H	2.31385	Pos	1.53477	5.86407x10-03	1.52636x10-02	1.12207	60730.9	54123.9
154.08359	150	150-4	HMDB0001645	L-Norleucine	Carboxylic acids and derivatives	C6H13NO2	+Na	1.68521	Pos	1.50074	5.03497x10-29	4.92054x10-27	2.97356	2813.98	946.335
154.08359	150	150-3	HMDB0000687	L-Leucine	Carboxylic acids and derivatives	C6H13NO2	+Na	1.68521	Pos	1.50074	5.03497x10-29	4.92054x10-27	2.97356	2813.98	946.335
154.08359	150	150-1	HMDB0000172	L-Isoleucine	Carboxylic acids and derivatives	C6H13NO2	+Na	1.68521	Pos	1.50074	5.03497x10-29	4.92054x10-27	2.97356	2813.98	946.335
154.08359	150	150-5	HMDB0003640	Beta-Leucine	Carboxylic acids and derivatives	C6H13NO2	+Na	1.68521	Pos	1.50074	5.03497x10-29	4.92054x10-27	2.97356	2813.98	946.335
154.08359	150	150-6	HMDB0013773	D-Leucine	Carboxylic acids and derivatives	C6H13NO2	+Na	1.68521	Pos	1.50074	5.03497x10-29	4.92054x10-27	2.97356	2813.98	946.335
154.08359	150	150-7	HMDB0060650	N-(2-Hydroxyethyl)-morpholine	Oxazinanes	C6H13NO2	+Na	1.68521	Pos	1.50074	5.03497x10-29	4.92054x10-27	2.97356	2813.98	946.335
154.08359	150	150-2	HMDB0000557	L-Alloisoleucine	Carboxylic acids and derivatives	C6H13NO2	+Na	1.68521	Pos	1.50074	5.03497x10-29	4.92054x10-27	2.97356	2813.98	946.335
280.09122	634	634-1	HMDB0000086	Glycerophosphocholine	Glycerophospholipids	C8H20NO6P	+Na	3.01529	Pos	1.47252	3.16317x10-15	8.50101x10-14	1.41955	7764.44	5469.64
209.05683	343	343-5	HMDB0246489	4-Methoxy-1-naphthaldehyde	Naphthalenes	C12H10O2	+Na	2.38894	Pos	1.45769	9.43590x10-12	1.42868x10-10	1.2704	11935.6	9395.14
209.05683	343	343-4	HMDB0245250	2-Naphthyl acetate	Naphthalenes	C12H10O2	+Na	2.38894	Pos	1.45769	9.43590x10-12	1.42868x10-10	1.2704	11935.6	9395.14
209.05683	343	343-8	HMDB0301834	Eutypine	Organooxygen compounds	C12H10O2	+Na	2.38894	Pos	1.45769	9.43590x10-12	1.42868x10-10	1.2704	11935.6	9395.14
209.05683	343	343-3	HMDB0243958	1-Naphthyl acetate	Naphthalenes	C12H10O2	+Na	2.38894	Pos	1.45769	9.43590x10-12	1.42868x10-10	1.2704	11935.6	9395.14
209.05683	343	343-2	HMDB0243757	[1,1'-Biphenyl]-2,3'-diol	Benzene and substituted derivatives	C12H10O2	+Na	2.38894	Pos	1.45769	9.43590x10-12	1.42868x10-10	1.2704	11935.6	9395.14
209.05683	343	343-6	HMDB0246987	2-Naphthylacetic acid	Naphthalenes	C12H10O2	+Na	2.38894	Pos	1.45769	9.43590x10-12	1.42868x10-10	1.2704	11935.6	9395.14
209.05683	343	343-1	HMDB0032708	1-Naphthaleneacetic acid	Naphthalenes	C12H10O2	+Na	2.38894	Pos	1.45769	9.43590x10-12	1.42868x10-10	1.2704	11935.6	9395.14
209.05683	343	343-7	HMDB0247086	6-Methoxy-2-naphthaldehyde	Naphthalenes	C12H10O2	+Na	2.38894	Pos	1.45769	9.43590x10-12	1.42868x10-10	1.2704	11935.6	9395.14
206.11726	329	329-1	HMDB0040046	1-(2,3-Dihydro-1H-pyrrolizin-5-yl)-1,4-pentanedione	Pyrrolizines	C12H15NO2	+H	1.66859	Pos	1.45734	2.48471x10-21	1.21412x10-19	2.1731	3579.92	1647.38
118.08624	52	52-2	HMDB0031648	2,4-Pentanedione	Organooxygen compounds	C5H8O2	+NH4	0.334078	Pos	1.44982	5.75124x10-09	5.52016x10-08	0.766933	9635.34	12563.5
118.08624	52	52-1	HMDB0031598	2,3-Pentanedione	Organooxygen compounds	C5H8O2	+NH4	0.334078	Pos	1.44982	5.75124x10-09	5.52016x10-08	0.766933	9635.34	12563.5
557.09424	924	924-1	HMDB0257286	Rocepafant	Thienodiazepines	C26H23ClN6OS2	+Na	2.40594	Pos	1.37874	2.02157x10-12	3.74687x10-11	1.28371	9878.14	7695.01
249.12482	504	504-1	HMDB0249257	Bis(ethylphenyl)ether	Benzene and substituted derivatives	C16H18O	+Na	0.639106	Pos	1.36188	1.38202x10-21	7.07463x10-20	2.01323	3349.83	1663.91
296.06536	685	685-1	HMDB0000982	5-Methylcytidine	Pyrimidine nucleosides	C10H15N3O5	+K	3.45883	Pos	1.31811	1.44238x10-10	1.82418x10-09	1.37991	7930.99	5747.49
167.05786	188	188-2	HMDB0034175	2-Aminoquinoline	Quinolines and derivatives	C9H8N2	+Na	0.6588	Pos	1.31102	1.12696x10-14	2.75336x10-13	1.31356	7566.57	5760.34
167.05786	188	188-1	HMDB0033178	5-Methylquinoxaline	Diazanaphthalenes	C9H8N2	+Na	0.6588	Pos	1.31102	1.12696x10-14	2.75336x10-13	1.31356	7566.57	5760.34
181.08297	242	242-1	HMDB0253204	Homocystamine	Organic disulfides	C6H16N2S2	+H	0.953568	Pos	1.26093	1.99332x10-16	6.49338x10-15	1.50806	4708.5	3122.22
320.11505	736	736-1	HMDB0247396	1-(2-Methylbenzo[d]oxazol-6-yl)-3-(1,5-naphthyridin-4-yl)urea	Diazanaphthalenes	C17H13N5O2	+H	2.5627	Pos	1.25645	1.07819x10-10	1.39645x10-09	1.28252	9165.57	7146.51
173.05698	212	212-4	HMDB0011743	2-Phenylpropionate	Phenylpropanoic acids	C9H10O2	+Na	2.12835	Pos	1.22998	2.05719x10-10	2.45720x10-09	1.22289	10776.3	8812.16
173.05698	212	212-1	HMDB0000764	Hydrocinnamic acid	Phenylpropanoic acids	C9H10O2	+Na	2.12835	Pos	1.22998	2.05719x10-10	2.45720x10-09	1.22289	10776.3	8812.16
173.05698	212	212-2	HMDB0002222	3-Methylphenylacetic acid	Benzene and substituted derivatives	C9H10O2	+Na	2.12835	Pos	1.22998	2.05719x10-10	2.45720x10-09	1.22289	10776.3	8812.16
173.05698	212	212-3	HMDB0002237	3,4-Dimethylbenzoic acid	Benzene and substituted derivatives	C9H10O2	+Na	2.12835	Pos	1.22998	2.05719x10-10	2.45720x10-09	1.22289	10776.3	8812.16
814.42410	2606	2606-2	HMDB0260703	PE(6 keto-PGF1alpha/14:1(9Z))	Unclassified	C39H70NO12P	+K	3.22167	Pos	1.22853	4.08270x10-07	2.92593x10-06	0.417468	1643.28	3936.29
814.42410	2606	2606-1	HMDB0260702	PE(14:1(9Z)/6 keto-PGF1alpha)	Unclassified	C39H70NO12P	+K	3.22167	Pos	1.22853	4.08270x10-07	2.92593x10-06	0.417468	1643.28	3936.29
814.42410	2606	2606-3	HMDB0260712	PE(14:1(9Z)/TXB2)	Unclassified	C39H70NO12P	+K	3.22167	Pos	1.22853	4.08270x10-07	2.92593x10-06	0.417468	1643.28	3936.29
814.42410	2606	2606-4	HMDB0260713	PE(TXB2/14:1(9Z))	Unclassified	C39H70NO12P	+K	3.22167	Pos	1.22853	4.08270x10-07	2.92593x10-06	0.417468	1643.28	3936.29
223.09396	401	401-1	HMDB0000962	Lipoamide	Dithiolanes	C8H15NOS2	+NH4	2.62331	Pos	1.22194	4.42176x10-12	7.54507x10-11	1.58792	4640.86	2922.61
229.11977	430	430-5	HMDB0035017	2-Phenylethyl 3-methylbutanoate	Fatty Acyls	C13H18O2	+Na	0.575937	Pos	1.20231	1.52596x10-14	3.64535x10-13	1.43246	5175.43	3612.96
229.11977	430	430-7	HMDB0036391	alpha-Methylphenethyl butyrate	Benzene and substituted derivatives	C13H18O2	+Na	0.575937	Pos	1.20231	1.52596x10-14	3.64535x10-13	1.43246	5175.43	3612.96
229.11977	430	430-3	HMDB0034469	2-Phenylpropyl butyrate	Fatty Acyls	C13H18O2	+Na	0.575937	Pos	1.20231	1.52596x10-14	3.64535x10-13	1.43246	5175.43	3612.96
229.11977	430	430-4	HMDB0035016	2-Phenylethyl pentanoate	Fatty Acyls	C13H18O2	+Na	0.575937	Pos	1.20231	1.52596x10-14	3.64535x10-13	1.43246	5175.43	3612.96
229.11977	430	430-2	HMDB0032176	Benzyl hexanoate	Benzene and substituted derivatives	C13H18O2	+Na	0.575937	Pos	1.20231	1.52596x10-14	3.64535x10-13	1.43246	5175.43	3612.96
229.11977	430	430-9	HMDB0037604	10beta-12,13-Dinor-8-oxo-6-eremophilen-11-al	Organooxygen compounds	C13H18O2	+Na	0.575937	Pos	1.20231	1.52596x10-14	3.64535x10-13	1.43246	5175.43	3612.96
229.11977	430	430-1	HMDB0029669	Eremopetasinorone A	Organooxygen compounds	C13H18O2	+Na	0.575937	Pos	1.20231	1.52596x10-14	3.64535x10-13	1.43246	5175.43	3612.96
229.11977	430	430-11	HMDB0040431	Hexyl benzoate	Benzene and substituted derivatives	C13H18O2	+Na	0.575937	Pos	1.20231	1.52596x10-14	3.64535x10-13	1.43246	5175.43	3612.96
229.11977	430	430-8	HMDB0037194	Ethyl-2-ethyl-3-phenylpropanoate	Fatty Acyls	C13H18O2	+Na	0.575937	Pos	1.20231	1.52596x10-14	3.64535x10-13	1.43246	5175.43	3612.96
229.11977	430	430-6	HMDB0036240	Methyl 4-tert-butylphenylacetate	Benzene and substituted derivatives	C13H18O2	+Na	0.575937	Pos	1.20231	1.52596x10-14	3.64535x10-13	1.43246	5175.43	3612.96
229.11977	430	430-10	HMDB0037720	2-Phenylethyl 2-methylbutanoate	Fatty Acyls	C13H18O2	+Na	0.575937	Pos	1.20231	1.52596x10-14	3.64535x10-13	1.43246	5175.43	3612.96
207.99796	337	337-2	HMDB0001721	DL-O-Phosphoserine	Carboxylic acids and derivatives	C3H8NO6P	+Na	0.873873	Pos	1.19694	2.43722x10-14	5.69569x10-13	1.46616	4880.26	3328.6
207.99796	337	337-1	HMDB0000272	Phosphoserine	Carboxylic acids and derivatives	C3H8NO6P	+Na	0.873873	Pos	1.19694	2.43722x10-14	5.69569x10-13	1.46616	4880.26	3328.6
133.07997	85	85-2	HMDB0302370	4-(Methylthio)-butanonitrile	Organonitrogen compounds	C5H9NS	+NH4	4.34903	Pos	1.19689	8.02595x10-12	1.26881x10-10	1.27326	7843.24	6159.99
133.07997	85	85-1	HMDB0302325	D-2-Butylisothiocyanate	Isothiocyanates	C5H9NS	+NH4	4.34903	Pos	1.19689	8.02595x10-12	1.26881x10-10	1.27326	7843.24	6159.99
213.14555	363	363-1	HMDB0247132	2-Amino-4-hydroxy-6,7-dimethyl-5,6,7,8-tetrahydropteridine	Pteridines and derivatives	C8H13N5O	+NH4	1.63089	Pos	1.18511	2.72493x10-12	4.96492x10-11	1.42788	5415.18	3792.47
239.06752	464	464-2	HMDB0030647	Artemidinol	Isocoumarins and derivatives	C13H12O3	+Na	1.4955	Pos	1.17947	1.33969x10-11	2.00023x10-10	1.30788	7294.95	5577.7
239.06752	464	464-1	HMDB0013989	O-Desmethylnaproxen	Naphthalenes	C13H12O3	+Na	1.4955	Pos	1.17947	1.33969x10-11	2.00023x10-10	1.30788	7294.95	5577.7
239.06752	464	464-4	HMDB0032656	(Z)-6-(2-Methoxyvinyl)-7-methyl-2H-1-benzopyran-2-one	Coumarins and derivatives	C13H12O3	+Na	1.4955	Pos	1.17947	1.33969x10-11	2.00023x10-10	1.30788	7294.95	5577.7
239.06752	464	464-5	HMDB0037723	2-Phenylethyl 2-furancarboxylate	Furans	C13H12O3	+Na	1.4955	Pos	1.17947	1.33969x10-11	2.00023x10-10	1.30788	7294.95	5577.7
239.06752	464	464-3	HMDB0032035	6-(3,4-Methylenedioxyphenyl)-3,5-hexadien-2-one	Benzodioxoles	C13H12O3	+Na	1.4955	Pos	1.17947	1.33969x10-11	2.00023x10-10	1.30788	7294.95	5577.7
239.06752	464	464-6	HMDB0038017	Ethyl 2-phenyl-3-furancarboxylate	Furans	C13H12O3	+Na	1.4955	Pos	1.17947	1.33969x10-11	2.00023x10-10	1.30788	7294.95	5577.7
166.95029	186	186-1	HMDB0257619	Phosphoric acid hydroxymethyl ester	Organic phosphoric acids and derivatives	CH5O5P	+K	2.25908	Pos	1.17784	1.32015x10-12	2.53421x10-11	1.43123	5229.68	3653.96
191.03991	271	271-1	HMDB0034425	(+)-1-Methylpropyl 3-(methylthio)-2-propenyl disulfide	Organic disulfides	C8H16S3	+H-H2O	3.5926	Pos	1.16611	1.37864x10-15	3.90009x10-14	1.57471	3780.97	2401.06
191.03991	271	271-2	HMDB0040242	3-Methyl-5-pentyl-1,2,4-trithiolane	Trithiolanes	C8H16S3	+H-H2O	3.5926	Pos	1.16611	1.37864x10-15	3.90009x10-14	1.57471	3780.97	2401.06
122.94539	61	61-1	HMDB0303537	Potassium hydrogen carbonate	Organic carbonic acids and derivatives	CHKO3	+Na	0.85981	Pos	1.13945	1.70498x10-15	4.69961x10-14	2.01204	2681.53	1332.74
267.09891	584	584-4	HMDB0032641	Batatasin IV	Stilbenes	C15H16O3	+Na	1.17966	Pos	1.11993	1.37010x10-09	1.45827x10-08	1.32406	6736.08	5087.46
267.09891	584	584-2	HMDB0030731	3-(1,1-Dimethylallyl)herniarin	Coumarins and derivatives	C15H16O3	+Na	1.17966	Pos	1.11993	1.37010x10-09	1.45827x10-08	1.32406	6736.08	5087.46
267.09891	584	584-3	HMDB0031925	5-Hydroxy-2-(5-methyl-1-oxo-4-hexenyl)benzofuran	Benzofurans	C15H16O3	+Na	1.17966	Pos	1.11993	1.37010x10-09	1.45827x10-08	1.32406	6736.08	5087.46
267.09891	584	584-6	HMDB0038548	Glandulone B	Prenol lipids	C15H16O3	+Na	1.17966	Pos	1.11993	1.37010x10-09	1.45827x10-08	1.32406	6736.08	5087.46
267.09891	584	584-1	HMDB0030636	Batatasin III	Stilbenes	C15H16O3	+Na	1.17966	Pos	1.11993	1.37010x10-09	1.45827x10-08	1.32406	6736.08	5087.46
267.09891	584	584-5	HMDB0034723	Encelin	Prenol lipids	C15H16O3	+Na	1.17966	Pos	1.11993	1.37010x10-09	1.45827x10-08	1.32406	6736.08	5087.46
285.12860	651	651-1	HMDB0038947	(S)-3-Methylthiohexyl hexanoate	Fatty Acyls	C13H26O2S	+K	0.247204	Pos	1.11181	1.30222x10-12	2.53421x10-11	1.57527	3930.22	2494.96
233.15076	442	442-1	HMDB0253447	Indanidine	Benzopyrazoles	C11H13N5	+NH4	0.697557	Pos	1.10507	9.62083x10-16	2.79524x10-14	1.84994	2721.26	1471
137.07056	96	96-1	HMDB0003152	N-Methylnicotinamide	Pyridines and derivatives	C7H8N2O	+H	2.88408	Pos	1.10467	1.55937x10-13	3.28692x10-12	1.42184	4710.42	3312.91
225.05172	411	411-1	HMDB0247512	7-Methyl-6,8-bis(methylthio)pyrrolo(1,2-a)pyrazine	Pyrrolopyrazines	C10H12N2S2	+H	1.08979	Pos	1.1012	5.71725x10-08	4.69164x10-07	1.22429	9496.32	7756.59
485.07291	855	855-1	HMDB0041969	Oxazepam glucuronide	Organooxygen compounds	C21H19ClN2O8	+Na	1.45006	Pos	1.08846	3.33492x10-17	1.19501x10-15	3.01542	1791.69	594.177
160.90116	169	169-1	HMDB0303534	Potassium carbonate (K2CO3)	Organic carbonic acids and derivatives	CK2O3	+Na	1.51735	Pos	1.086	1.79706x10-08	1.60987x10-07	1.71869	3902.49	2270.61
163.97766	177	177-1	HMDB0000251	Taurine	Organic sulfonic acids and derivatives	C2H7NO3S	+K	1.04584	Pos	1.06794	1.39008x10-09	1.46503x10-08	0.78223	5297.8	6772.69
238.04476	460	460-1	HMDB0000114	Glycerylphosphorylethanolamine	Glycerophospholipids	C5H14NO6P	+Na	1.39723	Pos	1.05845	2.18650x10-16	6.91319x10-15	1.80473	2604.83	1443.34
155.06200	154	154-3	HMDB0257045	Quinoline-3-carboxamide	Quinolines and derivatives	C10H8N2O	+H-H2O	3.41881	Pos	1.04123	3.27953x10-12	5.87583x10-11	1.39404	4558.63	3270.07
155.06200	154	154-1	HMDB0037296	3-Acetyl-2,7-naphthyridine	Diazanaphthalenes	C10H8N2O	+H-H2O	3.41881	Pos	1.04123	3.27953x10-12	5.87583x10-11	1.39404	4558.63	3270.07
155.06200	154	154-2	HMDB0038462	4-Hydroxy-1H-indole-3-acetonitrile	Indoles and derivatives	C10H8N2O	+H-H2O	3.41881	Pos	1.04123	3.27953x10-12	5.87583x10-11	1.39404	4558.63	3270.07
203.22253	320	320-1	HMDB0001256	Spermine	Organonitrogen compounds	C10H26N4	+H	2.49773	Pos	1.02956	1.23479x10-06	8.58555x10-06	0.77719	5681.67	7310.53
192.02398	276	276-1	HMDB0257054	quinoxaline-6-sulfonamide	Diazanaphthalenes	C8H7N3O2S	+H-H2O	1.40514	Pos	1.02508	5.24142x10-14	1.19884x10-12	1.53142	3333.09	2176.46
195.09866	288	288-1	HMDB0247091	4(1H)-Pteridinone, 2-amino-6-methyl-	Pteridines and derivatives	C7H7N5O	+NH4	1.15598	Pos	1.02015	3.04206x10-10	3.47895x10-09	1.35971	4907.02	3608.88
245.07771	486	486-2	HMDB0028815	Glutamylaspartic acid	Peptidomimetics	C9H14N2O7	+H-H2O	0.830623	Pos	1.01798	3.66707x10-12	6.46245x10-11	1.27068	5629.11	4429.99
245.07771	486	486-1	HMDB0028752	Aspartyl-Glutamate	Carboxylic acids and derivatives	C9H14N2O7	+H-H2O	0.830623	Pos	1.01798	3.66707x10-12	6.46245x10-11	1.27068	5629.11	4429.99
245.07771	486	486-3	HMDB0062501	N-Acetyl-serylaspartic acid	Carboxylic acids and derivatives	C9H14N2O7	+H-H2O	0.830623	Pos	1.01798	3.66707x10-12	6.46245x10-11	1.27068	5629.11	4429.99
195.07810	287	287-2	HMDB0031621	Cinnamylideneacetone	Benzene and substituted derivatives	C12H12O	+Na	0.341498	Pos	1.01792	1.39139x10-13	2.99148x10-12	1.44534	3804.02	2631.92
195.07810	287	287-1	HMDB0029688	2-Ethoxynaphthalene	Naphthalenes	C12H12O	+Na	0.341498	Pos	1.01792	1.39139x10-13	2.99148x10-12	1.44534	3804.02	2631.92
350.98617	775	775-1	HMDB0258411	N-Succinimidyl 3-(2-pyridyldithio)propionate	Pyridines and derivatives	C12H12N2O4S2	+K	2.52071	Pos	1.00863	9.05563x10-12	1.39069x10-10	1.35143	4638.78	3432.49
277.10446	622	622-1	HMDB0032796	Methyl 3-(2,3-dihydroxy-3-methylbutyl)-4-hydroxybenzoate	Benzene and substituted derivatives	C13H18O5	+Na	0.797414	Pos	1.0061	1.12869x10-07	9.05482x10-07	1.23027	7885.1	6409.23
m/z, mass-to-charge ratio; VIP, variable importance in projection; FC, fold change; Neg, negative; Pos, positive; SCI, spinal cord injury; PPM, parts per million.

## Sheet: SCI-Ventral_Sham-Ventral
Table SIII. Differentially expressed metabolites in the dorsal and ventral horns.
m/z	ID	ID-number	Compound ID	Metabolites	Class	Formula	Adduct	PPM	Ion mode	VIP	P-value	Adjusted P-value	FC	Average (SCI-Ventral horn)	Average (Sham-Ventral Horn)
174.04088	67	67-1	HMDB0247079	6-Hydroxymethylpterin	Pteridines and derivatives	C7H7N5O2	-H2O-H	1.09655	Neg	7.40402	7.71942x10-36	1.37234x10-34	1.85115	103725	56032.6
146.04580	47	47-1	HMDB0000897	7-Methylguanine	Imidazopyrimidines	C6H7N5O	-H2O-H	2.48372	Neg	4.19671	1.87137x10-50	7.79855x10-49	2.02373	27348.8	13514
146.04580	47	47-2	HMDB0006040	N2-Methylguanine	Imidazopyrimidines	C6H7N5O	-H2O-H	2.48372	Neg	4.19671	1.87137x10-50	7.79855x10-49	2.02373	27348.8	13514
96.96965	9	9-1	HMDB0303539	Potassium acetate	Carboxylic acids and derivatives	C2H3KO2	-H	0.850142	Neg	4.17253	4.89304x10-60	7.82887x10-58	1.61576	34686.9	21467.9
133.01412	32	32-3	HMDB0039790	Tetrahydro-2-methyl-3-thiophenethiol	Thiolanes	C5H10S2	-H	0.5664	Neg	3.61139	1.87406x10-52	1.49925x10-50	1.96968	20555.3	10435.9
133.01412	32	32-1	HMDB0038974	3,3-Dimethyl-1,2-dithiolane	Dithiolanes	C5H10S2	-H	0.5664	Neg	3.61139	1.87406x10-52	1.49925x10-50	1.96968	20555.3	10435.9
133.01412	32	32-2	HMDB0039789	Tetrahydro-2-methyl-2-thiophenethiol	Thiolanes	C5H10S2	-H	0.5664	Neg	3.61139	1.87406x10-52	1.49925x10-50	1.96968	20555.3	10435.9
132.03014	30	30-3	HMDB0000542	8-Hydroxyadenine	Imidazopyrimidines	C5H5N5O	-H2O-H	2.75481	Neg	3.44161	1.94964x10-50	7.79855x10-49	2.10297	17707.6	8420.31
132.03014	30	30-1	HMDB0000132	Guanine	Imidazopyrimidines	C5H5N5O	-H2O-H	2.75481	Neg	3.44161	1.94964x10-50	7.79855x10-49	2.10297	17707.6	8420.31
132.03014	30	30-2	HMDB0000403	2-Hydroxyadenine	Imidazopyrimidines	C5H5N5O	-H2O-H	2.75481	Neg	3.44161	1.94964x10-50	7.79855x10-49	2.10297	17707.6	8420.31
175.02493	68	68-2	HMDB0258965	theophylline one	Imidazopyrimidines	C7H6N4O3	-H2O-H	0.844934	Neg	1.93928	1.27278x10-37	2.54556x10-36	1.88832	6937.12	3673.71
175.02493	68	68-1	HMDB0033245	6-(Hydroxymethyl)-2,4(1H,3H)-pteridinedione	Pteridines and derivatives	C7H6N4O3	-H2O-H	0.844934	Neg	1.93928	1.27278x10-37	2.54556x10-36	1.88832	6937.12	3673.71
117.01946	18	18-1	HMDB0000157	Hypoxanthine	Imidazopyrimidines	C5H4N4O	-H2O-H	1.04021	Neg	1.83293	1.45492x10-09	5.32702x10-09	1.24205	27942.3	22497
179.05629	73	73-1	HMDB0004400	5-Acetylamino-6-amino-3-methyluracil	Organonitrogen compounds	C7H10N4O3	-H2O-H	0.588097	Neg	1.48438	4.61461x10-18	3.21017x10-17	1.45436	8278.67	5692.31
145.06186	46	46-1	HMDB0031642	N-Nitroso-pyrrolidine	Pyrrolidines	C4H8N2O	+FA-H	0.0425209	Neg	1.42463	3.07119x10-38	7.01987x10-37	1.58094	4739.01	2997.58
145.06186	46	46-2	HMDB0033952	Gyromitrin	Organonitrogen compounds	C4H8N2O	+FA-H	0.0425209	Neg	1.42463	3.07119x10-38	7.01987x10-37	1.58094	4739.01	2997.58
255.23343	125	125-1	HMDB0031082	1-Pentadecene	Unsaturated hydrocarbons	C15H30	+FA-H	1.87763	Neg	1.25912	4.38568x10-10	1.75427x10-09	1.25246	12097.8	9659.18
255.23343	125	125-2	HMDB0031083	(E)-7-Pentadecene	Unsaturated hydrocarbons	C15H30	+FA-H	1.87763	Neg	1.25912	4.38568x10-10	1.75427x10-09	1.25246	12097.8	9659.18
171.00631	64	64-1	HMDB0012228	Ethylphosphate	Organic phosphoric acids and derivatives	C2H7O4P	+FA-H	0.5196	Neg	1.24524	4.56786x10-44	1.46172x10-42	3.55014	1808.58	509.438
215.03274	98	98-3	HMDB0002825	Theobromine	Imidazopyrimidines	C7H8N4O2	+Cl	1.55056	Neg	1.22181	2.71382x10-18	1.97369x10-17	1.48745	5376.47	3614.55
215.03274	98	98-2	HMDB0001889	Theophylline	Imidazopyrimidines	C7H8N4O2	+Cl	1.55056	Neg	1.22181	2.71382x10-18	1.97369x10-17	1.48745	5376.47	3614.55
215.03274	98	98-1	HMDB0001860	Paraxanthine	Imidazopyrimidines	C7H8N4O2	+Cl	1.55056	Neg	1.22181	2.71382x10-18	1.97369x10-17	1.48745	5376.47	3614.55
303.08405	147	147-1	HMDB0252307	Flobufen	Organooxygen compounds	C17H14F2O3	-H	4.19357	Neg	1.21294	1.81795x10-18	1.38510x10-17	1.93592	3379.13	1745.5
211.99662	96	96-1	HMDB0012250	L-Aspartyl-4-phosphate	Carboxylic acids and derivatives	C4H8NO7P	-H	0.257407	Neg	1.18584	1.51570x10-40	4.04187x10-39	2.13664	2220.07	1039.05
116.90717	17	17-1	HMDB0251189	Dichloromethylene	Organochlorides	CCl2	+Cl	0.578225	Neg	1.14811	1.39790x10-31	2.03331x10-30	0.462796	1007.76	2177.54
130.06239	29	29-1	HMDB0000064	Creatine	Carboxylic acids and derivatives	C4H9N3O2	-H	1.48196	Neg	1.06661	2.27981x10-34	3.64769x10-33	1.69227	2474.95	1462.5
130.06239	29	29-2	HMDB0013222	Beta-Guanidinopropionic acid	Organonitrogen compounds	C4H9N3O2	-H	1.48196	Neg	1.06661	2.27981x10-34	3.64769x10-33	1.69227	2474.95	1462.5
125.00117	24	24-4	HMDB0001311	D-Lactic acid	Hydroxy acids and derivatives	C3H6O3	+Cl	0.582743	Neg	1.04437	2.32623x10-26	2.86305x10-25	1.66398	2776.21	1668.42
125.00117	24	24-1	HMDB0000190	L-Lactic acid	Hydroxy acids and derivatives	C3H6O3	+Cl	0.582743	Neg	1.04437	2.32623x10-26	2.86305x10-25	1.66398	2776.21	1668.42
125.00117	24	24-3	HMDB0001051	Glyceraldehyde	Organooxygen compounds	C3H6O3	+Cl	0.582743	Neg	1.04437	2.32623x10-26	2.86305x10-25	1.66398	2776.21	1668.42
125.00117	24	24-5	HMDB0001882	Dihydroxyacetone	Organooxygen compounds	C3H6O3	+Cl	0.582743	Neg	1.04437	2.32623x10-26	2.86305x10-25	1.66398	2776.21	1668.42
125.00117	24	24-2	HMDB0000700	Hydroxypropionic acid	Hydroxy acids and derivatives	C3H6O3	+Cl	0.582743	Neg	1.04437	2.32623x10-26	2.86305x10-25	1.66398	2776.21	1668.42
104.10711	28	28-1	HMDB0244984	2-Amino-3-methyl-1-butanol	Organonitrogen compounds	C5H13NO	+H	1.08344	Pos	18.1441	9.30729x10-76	5.00267x10-73	2.01197	678721	337341
317.11371	728	728-4	HMDB0041516	Avenanthramide G	Cinnamic acids and derivatives	C16H13NO5	+NH4	1.43951	Pos	11.4645	2.05728x10-33	1.00526x10-31	1.26758	816703	644302
317.11371	728	728-2	HMDB0038577	(Z)-N-Coumaroyl-5-hydroxyanthranilic acid	Cinnamic acids and derivatives	C16H13NO5	+NH4	1.43951	Pos	11.4645	2.05728x10-33	1.00526x10-31	1.26758	816703	644302
317.11371	728	728-3	HMDB0041141	Marshdine	Quinolines and derivatives	C16H13NO5	+NH4	1.43951	Pos	11.4645	2.05728x10-33	1.00526x10-31	1.26758	816703	644302
317.11371	728	728-1	HMDB0029284	Avenanthramide 1c	Cinnamic acids and derivatives	C16H13NO5	+NH4	1.43951	Pos	11.4645	2.05728x10-33	1.00526x10-31	1.26758	816703	644302
132.07641	81	81-2	HMDB0003646	N-Methylhydantoin	Azolines	C4H6N2O2	+NH4	2.73067	Pos	8.13663	1.00897x10-68	3.61547x10-66	1.54645	202170	130732
132.07641	81	81-1	HMDB0000076	Dihydrouracil	Diazines	C4H6N2O2	+NH4	2.73067	Pos	8.13663	1.00897x10-68	3.61547x10-66	1.54645	202170	130732
170.03260	199	199-1	HMDB0000064	Creatine	Carboxylic acids and derivatives	C4H9N3O2	+K	0.207655	Pos	6.66307	5.51086x10-57	1.48104x10-54	1.62201	128108	78981.2
170.03260	199	199-2	HMDB0013222	Beta-Guanidinopropionic acid	Organonitrogen compounds	C4H9N3O2	+K	0.207655	Pos	6.66307	5.51086x10-57	1.48104x10-54	1.62201	128108	78981.2
104.07068	26	26-4	HMDB0000650	D-alpha-Aminobutyric acid	Carboxylic acids and derivatives	C4H9NO2	+H	0.579005	Pos	5.73253	5.70164x10-80	6.12927x10-77	2.19196	62959.3	28722.8
104.07068	26	26-8	HMDB0003911	3-Aminoisobutanoic acid	Carboxylic acids and derivatives	C4H9NO2	+H	0.579005	Pos	5.73253	5.70164x10-80	6.12927x10-77	2.19196	62959.3	28722.8
104.07068	26	26-5	HMDB0001906	2-Aminoisobutyric acid	Carboxylic acids and derivatives	C4H9NO2	+H	0.579005	Pos	5.73253	5.70164x10-80	6.12927x10-77	2.19196	62959.3	28722.8
104.07068	26	26-3	HMDB0000452	L-alpha-Aminobutyric acid	Carboxylic acids and derivatives	C4H9NO2	+H	0.579005	Pos	5.73253	5.70164x10-80	6.12927x10-77	2.19196	62959.3	28722.8
104.07068	26	26-6	HMDB0002166	(S)-beta-Aminoisobutyric acid	Carboxylic acids and derivatives	C4H9NO2	+H	0.579005	Pos	5.73253	5.70164x10-80	6.12927x10-77	2.19196	62959.3	28722.8
104.07068	26	26-10	HMDB0031654	3-Aminobutanoic acid	Carboxylic acids and derivatives	C4H9NO2	+H	0.579005	Pos	5.73253	5.70164x10-80	6.12927x10-77	2.19196	62959.3	28722.8
104.07068	26	26-9	HMDB0031329	Butyl nitrite	Organonitrogen compounds	C4H9NO2	+H	0.579005	Pos	5.73253	5.70164x10-80	6.12927x10-77	2.19196	62959.3	28722.8
104.07068	26	26-2	HMDB0000112	gamma-Aminobutyric acid	Carboxylic acids and derivatives	C4H9NO2	+H	0.579005	Pos	5.73253	5.70164x10-80	6.12927x10-77	2.19196	62959.3	28722.8
104.07068	26	26-11	HMDB0041945	N-Ethylglycine	Carboxylic acids and derivatives	C4H9NO2	+H	0.579005	Pos	5.73253	5.70164x10-80	6.12927x10-77	2.19196	62959.3	28722.8
104.07068	26	26-7	HMDB0002299	(R)-beta-Aminoisobutyric acid	Carboxylic acids and derivatives	C4H9NO2	+H	0.579005	Pos	5.73253	5.70164x10-80	6.12927x10-77	2.19196	62959.3	28722.8
104.07068	26	26-1	HMDB0000092	Dimethylglycine	Carboxylic acids and derivatives	C4H9NO2	+H	0.579005	Pos	5.73253	5.70164x10-80	6.12927x10-77	2.19196	62959.3	28722.8
255.06258	525	525-2	HMDB0033330	Dihydrocoriandrin	Benzopyrans	C13H12O4	+Na	0.930018	Pos	5.34563	2.71750x10-35	1.53753x10-33	1.30125	160543	123377
255.06258	525	525-4	HMDB0041325	Salfredin B11	Benzopyrans	C13H12O4	+Na	0.930018	Pos	5.34563	2.71750x10-35	1.53753x10-33	1.30125	160543	123377
255.06258	525	525-1	HMDB0030813	Cassiachromone	Benzopyrans	C13H12O4	+Na	0.930018	Pos	5.34563	2.71750x10-35	1.53753x10-33	1.30125	160543	123377
255.06258	525	525-5	HMDB0255452	Naphthoxylactic acid	Naphthalenes	C13H12O4	+Na	0.930018	Pos	5.34563	2.71750x10-35	1.53753x10-33	1.30125	160543	123377
255.06258	525	525-3	HMDB0038911	(2S,3S,4S)-5,7,9,11-Tridecatetrayne-1,2,3,4-tetrol	Fatty Acyls	C13H12O4	+Na	0.930018	Pos	5.34563	2.71750x10-35	1.53753x10-33	1.30125	160543	123377
154.05819	149	149-2	HMDB0013222	Beta-Guanidinopropionic acid	Organonitrogen compounds	C4H9N3O2	+Na	3.30462	Pos	4.94732	5.04738x10-53	1.08519x10-50	1.40944	96963.1	68795.7
154.05819	149	149-1	HMDB0000064	Creatine	Carboxylic acids and derivatives	C4H9N3O2	+Na	3.30462	Pos	4.94732	5.04738x10-53	1.08519x10-50	1.40944	96963.1	68795.7
318.11732	730	730-2	HMDB0255293	N2-Ethyl-2'-deoxyguanosine	Purine nucleosides	C12H17N5O4	+Na	0.0224615	Pos	4.76857	2.03609x10-30	8.41844x10-29	1.27551	142077	111389
318.11732	730	730-1	HMDB0255287	N(6),O(2)-Dimethyladenosine	Purine nucleosides	C12H17N5O4	+Na	0.0224615	Pos	4.76857	2.03609x10-30	8.41844x10-29	1.27551	142077	111389
207.07794	333	333-1	HMDB0249075	Benzyl phenyl ether	Phenol ethers	C13H12O	+Na	0.67194	Pos	4.4145	5.25114x10-44	5.64498x10-42	1.49948	70424.7	46966.1
189.05176	265	265-1	HMDB0244601	2-(Sec-butyldisulfanyl)-1h-imidazole	Azoles	C7H12N2S2	+H	1.48533	Pos	4.06797	2.30603x10-48	3.54141x10-46	1.46446	60623.7	41396.7
201.08853	310	310-2	HMDB0035013	2-Phenylethyl propanoate	Benzene and substituted derivatives	C11H14O2	+Na	0.513168	Pos	3.30861	1.09302x10-20	1.99151x10-19	1.20247	104969	87294.5
201.08853	310	310-4	HMDB0038179	3-(2-Hydroxy-4-methylphenyl)-2-butanone	Prenol lipids	C11H14O2	+Na	0.513168	Pos	3.30861	1.09302x10-20	1.99151x10-19	1.20247	104969	87294.5
201.08853	310	310-3	HMDB0036385	Methyl 4-phenylbutanoate	Fatty Acyls	C11H14O2	+Na	0.513168	Pos	3.30861	1.09302x10-20	1.99151x10-19	1.20247	104969	87294.5
201.08853	310	310-1	HMDB0031864	Methyleugenol	Benzene and substituted derivatives	C11H14O2	+Na	0.513168	Pos	3.30861	1.09302x10-20	1.99151x10-19	1.20247	104969	87294.5
201.08853	310	310-5	HMDB0040411	Ethyl 3-phenylpropanoate	Fatty Acyls	C11H14O2	+Na	0.513168	Pos	3.30861	1.09302x10-20	1.99151x10-19	1.20247	104969	87294.5
213.05178	361	361-5	HMDB0040938	Coixinden A	Indenes and isoindenes	C11H10O3	+Na	2.31491	Pos	3.11459	1.76548x10-35	1.11640x10-33	1.35778	47204.8	34766.2
213.05178	361	361-7	HMDB0247248	7-Ethoxycoumarin	Coumarins and derivatives	C11H10O3	+Na	2.31491	Pos	3.11459	1.76548x10-35	1.11640x10-33	1.35778	47204.8	34766.2
213.05178	361	361-4	HMDB0040731	Avenalumic acid	Benzene and substituted derivatives	C11H10O3	+Na	2.31491	Pos	3.11459	1.76548x10-35	1.11640x10-33	1.35778	47204.8	34766.2
213.05178	361	361-1	HMDB0032991	7-Methoxy-6-methyl-2H-1-benzopyran-2-one	Coumarins and derivatives	C11H10O3	+Na	2.31491	Pos	3.11459	1.76548x10-35	1.11640x10-33	1.35778	47204.8	34766.2
213.05178	361	361-2	HMDB0039359	Methyl (Z,Z)-10-hydroxy-2,8-decadiene-4,6-diynoate	Fatty Acyls	C11H10O3	+Na	2.31491	Pos	3.11459	1.76548x10-35	1.11640x10-33	1.35778	47204.8	34766.2
213.05178	361	361-3	HMDB0040326	7-Hydroxy-2,5-dimethyl-4H-1-benzopyran-4-one	Benzopyrans	C11H10O3	+Na	2.31491	Pos	3.11459	1.76548x10-35	1.11640x10-33	1.35778	47204.8	34766.2
213.05178	361	361-6	HMDB0041122	(S)-2,3-Dihydro-5-hydroxy-2-methyl-1,4-naphthoquinone	Naphthalenes	C11H10O3	+Na	2.31491	Pos	3.11459	1.76548x10-35	1.11640x10-33	1.35778	47204.8	34766.2
145.02576	114	114-1	HMDB0303720	Sodium benzoate	Benzene and substituted derivatives	C7H5NaO2	+H	1.69278	Pos	2.9888	3.99374x10-31	1.78886x10-29	1.25486	59767	47628.6
319.11239	733	733-2	HMDB0245678	4-Nitrophenyl beta-D-glucopyranoside	Organooxygen compounds	C12H15NO8	+NH4	3.90983	Pos	2.74156	8.66486x10-25	2.45124x10-23	1.25289	54375.5	43399.9
319.11239	733	733-1	HMDB0244855	2-Nitrophenyl a-D-galactopyranoside	Organooxygen compounds	C12H15NO8	+NH4	3.90983	Pos	2.74156	8.66486x10-25	2.45124x10-23	1.25289	54375.5	43399.9
127.02671	71	71-2	HMDB0252088	Ethylurea	Organic carbonic acids and derivatives	C3H8N2O	+K	0.840775	Pos	2.46858	3.88254x10-27	1.30429x10-25	1.26678	40804.6	32211.2
127.02671	71	71-1	HMDB0244027	1,1-Dimethylurea	Organic carbonic acids and derivatives	C3H8N2O	+K	0.840775	Pos	2.46858	3.88254x10-27	1.30429x10-25	1.26678	40804.6	32211.2
127.02671	71	71-3	HMDB0253863	L-alaninamide	Carboxylic acids and derivatives	C3H8N2O	+K	0.840775	Pos	2.46858	3.88254x10-27	1.30429x10-25	1.26678	40804.6	32211.2
210.19596	351	351-3	HMDB0259120	Trenbolone acetate	Pyrrolidines	C12H20N2	+NH4	2.53206	Pos	2.41414	8.17855x10-46	9.76882x10-44	1.81915	14669.2	8063.75
210.19596	351	351-2	HMDB0252283	Hydroxypropylcellulose	Benzene and substituted derivatives	C12H20N2	+NH4	2.53206	Pos	2.41414	8.17855x10-46	9.76882x10-44	1.81915	14669.2	8063.75
210.19596	351	351-1	HMDB0248301	Amiflamina	Benzene and substituted derivatives	C12H20N2	+NH4	2.53206	Pos	2.41414	8.17855x10-46	9.76882x10-44	1.81915	14669.2	8063.75
196.18052	292	292-2	HMDB0303880	2-isopentyl-3,6-dimethyl pyrazine	Diazines	C11H18N2	+NH4	1.61869	Pos	2.24392	3.88268x10-36	2.98134x10-34	1.89467	13388.4	7066.34
196.18052	292	292-1	HMDB0246317	4-[(2S)-2-Aminopropyl]-N,3-dimethylaniline	Benzene and substituted derivatives	C11H18N2	+NH4	1.61869	Pos	2.24392	3.88268x10-36	2.98134x10-34	1.89467	13388.4	7066.34
233.07845	440	440-1	HMDB0013070	Sinapyl alcohol	Phenols	C11H14O4	+Na	0.129898	Pos	2.05146	1.89709x10-30	8.15751x10-29	1.3116	24226	18470.6
175.00159	218	218-1	HMDB0000157	Hypoxanthine	Imidazopyrimidines	C5H4N4O	+K	0.653431	Pos	1.81586	3.54245x10-51	6.34689x10-49	1.75389	8676.47	4946.98
114.06634	49	49-2	HMDB0246116	3(2H)-Pyridazinone	Diazines	C4H4N2O	+NH4	1.16501	Pos	1.75115	2.60005x10-35	1.53753x10-33	1.52345	11343.5	7445.89
114.06634	49	49-3	HMDB0246813	5-Hydroxypyrimidine	Diazines	C4H4N2O	+NH4	1.16501	Pos	1.75115	2.60005x10-35	1.53753x10-33	1.52345	11343.5	7445.89
114.06634	49	49-5	HMDB0256976	pyrimidin-4-ol	Diazines	C4H4N2O	+NH4	1.16501	Pos	1.75115	2.60005x10-35	1.53753x10-33	1.52345	11343.5	7445.89
114.06634	49	49-1	HMDB0245166	2-Hydroxypyrazine	Diazines	C4H4N2O	+NH4	1.16501	Pos	1.75115	2.60005x10-35	1.53753x10-33	1.52345	11343.5	7445.89
114.06634	49	49-4	HMDB0256975	pyrimidin-2-ol	Diazines	C4H4N2O	+NH4	1.16501	Pos	1.75115	2.60005x10-35	1.53753x10-33	1.52345	11343.5	7445.89
137.07056	96	96-1	HMDB0003152	N-Methylnicotinamide	Pyridines and derivatives	C7H8N2O	+H	2.88408	Pos	1.66889	5.70273x10-48	7.66304x10-46	1.71911	7669.75	4461.47
296.06536	685	685-1	HMDB0000982	5-Methylcytidine	Pyrimidine nucleosides	C10H15N3O5	+K	3.45883	Pos	1.62744	2.70390x10-40	2.64245x10-38	1.63552	8263.76	5052.7
199.03630	302	302-7	HMDB0251931	Erythrocentaurin	Benzopyrans	C10H8O3	+Na	1.5699	Pos	1.57462	3.98328x10-24	1.01953x10-22	1.32039	15471.3	11717.2
199.03630	302	302-8	HMDB0303033	8-Methoxycoumarin	Coumarins and derivatives	C10H8O3	+Na	1.5699	Pos	1.57462	3.98328x10-24	1.01953x10-22	1.32039	15471.3	11717.2
199.03630	302	302-4	HMDB0032990	7-Hydroxy-6-methyl-2H-1-benzopyran-2-one	Coumarins and derivatives	C10H8O3	+Na	1.5699	Pos	1.57462	3.98328x10-24	1.01953x10-22	1.32039	15471.3	11717.2
199.03630	302	302-2	HMDB0031054	10-Hydroxy-2,8-decadiene-4,6-diynoic acid	Fatty Acyls	C10H8O3	+Na	1.5699	Pos	1.57462	3.98328x10-24	1.01953x10-22	1.32039	15471.3	11717.2
199.03630	302	302-5	HMDB0033813	3-(3,4-Methylenedioxyphenyl)propenal	Benzodioxoles	C10H8O3	+Na	1.5699	Pos	1.57462	3.98328x10-24	1.01953x10-22	1.32039	15471.3	11717.2
199.03630	302	302-6	HMDB0059622	4-Methylumbelliferone	Coumarins and derivatives	C10H8O3	+Na	1.5699	Pos	1.57462	3.98328x10-24	1.01953x10-22	1.32039	15471.3	11717.2
199.03630	302	302-1	HMDB0029758	Herniarin	Coumarins and derivatives	C10H8O3	+Na	1.5699	Pos	1.57462	3.98328x10-24	1.01953x10-22	1.32039	15471.3	11717.2
199.03630	302	302-3	HMDB0032883	1,4,5-Naphthalenetriol	Naphthalenes	C10H8O3	+Na	1.5699	Pos	1.57462	3.98328x10-24	1.01953x10-22	1.32039	15471.3	11717.2
136.04779	91	91-1	HMDB0000562	Creatinine	Carboxylic acids and derivatives	C4H7N3O	+Na	2.75698	Pos	1.57253	3.06220x10-31	1.43125x10-29	1.45345	10618.7	7305.84
193.06222	280	280-1	HMDB0032412	Methyl beta-naphthyl ketone	Naphthalenes	C12H10O	+Na	1.07173	Pos	1.54463	4.98514x10-28	1.84794x10-26	1.52403	9792.41	6425.34
193.06222	280	280-3	HMDB0034446	Diphenyl ether	Benzene and substituted derivatives	C12H10O	+Na	1.07173	Pos	1.54463	4.98514x10-28	1.84794x10-26	1.52403	9792.41	6425.34
193.06222	280	280-2	HMDB0032582	2-Biphenylol	Benzene and substituted derivatives	C12H10O	+Na	1.07173	Pos	1.54463	4.98514x10-28	1.84794x10-26	1.52403	9792.41	6425.34
133.07997	85	85-2	HMDB0302370	4-(Methylthio)-butanonitrile	Organonitrogen compounds	C5H9NS	+NH4	4.34903	Pos	1.5108	3.35267x10-36	2.77240x10-34	1.55055	8379.8	5404.4
133.07997	85	85-1	HMDB0302325	D-2-Butylisothiocyanate	Isothiocyanates	C5H9NS	+NH4	4.34903	Pos	1.5108	3.35267x10-36	2.77240x10-34	1.55055	8379.8	5404.4
307.04358	705	705-2	HMDB0000481	Allopurinol riboside	Pyrazolo[3,4-d]pyrimidine glycosides	C10H12N4O5	+K	1.23555	Pos	1.4929	2.73004x10-34	1.39752x10-32	1.6743	7161.46	4277.29
307.04358	705	705-3	HMDB0003040	Arabinosylhypoxanthine	Purine nucleosides	C10H12N4O5	+K	1.23555	Pos	1.4929	2.73004x10-34	1.39752x10-32	1.6743	7161.46	4277.29
307.04358	705	705-1	HMDB0000195	Inosine	Purine nucleosides	C10H12N4O5	+K	1.23555	Pos	1.4929	2.73004x10-34	1.39752x10-32	1.6743	7161.46	4277.29
691.35753	2065	2065-1	HMDB0262711	PA(10:0/22:6(5Z,8E,10Z,13Z,15E,19Z)-2OH(7S, 17S))	Unclassified	C35H57O10P	+Na	0.907443	Pos	1.46724	3.23841x10-20	5.27469x10-19	0.346873	1772.65	5110.38
691.35753	2065	2065-2	HMDB0262712	PA(22:6(5Z,8E,10Z,13Z,15E,19Z)-2OH(7S, 17S)/10:0)	Unclassified	C35H57O10P	+Na	0.907443	Pos	1.46724	3.23841x10-20	5.27469x10-19	0.346873	1772.65	5110.38
691.35753	2065	2065-3	HMDB0262727	PA(10:0/22:6(4Z,7Z,11E,13Z,15E,19Z)-2OH(10S,17))	Unclassified	C35H57O10P	+Na	0.907443	Pos	1.46724	3.23841x10-20	5.27469x10-19	0.346873	1772.65	5110.38
691.35753	2065	2065-4	HMDB0262728	PA(22:6(4Z,7Z,11E,13Z,15E,19Z)-2OH(10S,17)/10:0)	Unclassified	C35H57O10P	+Na	0.907443	Pos	1.46724	3.23841x10-20	5.27469x10-19	0.346873	1772.65	5110.38
223.07257	400	400-4	HMDB0240711	Bisphenol F	Benzene and substituted derivatives	C13H12O2	+Na	1.94732	Pos	1.45713	9.04038x10-23	1.98335x10-21	1.37678	12060.5	8759.89
223.07257	400	400-10	HMDB0302506	4-Deoxy-2,3-dihydromycosinol	Organooxygen compounds	C13H12O2	+Na	1.94732	Pos	1.45713	9.04038x10-23	1.98335x10-21	1.37678	12060.5	8759.89
223.07257	400	400-2	HMDB0030646	(Z)-3-(1-Butenyl)-1H-2-benzopyran-1-one	Isocoumarins and derivatives	C13H12O2	+Na	1.94732	Pos	1.45713	9.04038x10-23	1.98335x10-21	1.37678	12060.5	8759.89
223.07257	400	400-9	HMDB0250959	Dehydrotremetone	Benzofurans	C13H12O2	+Na	1.94732	Pos	1.45713	9.04038x10-23	1.98335x10-21	1.37678	12060.5	8759.89
223.07257	400	400-6	HMDB0245357	2,2'-Methylenediphenol	Benzene and substituted derivatives	C13H12O2	+Na	1.94732	Pos	1.45713	9.04038x10-23	1.98335x10-21	1.37678	12060.5	8759.89
223.07257	400	400-1	HMDB0014738	Monobenzone	Phenols	C13H12O2	+Na	1.94732	Pos	1.45713	9.04038x10-23	1.98335x10-21	1.37678	12060.5	8759.89
223.07257	400	400-3	HMDB0036460	Safynol	Fatty Acyls	C13H12O2	+Na	1.94732	Pos	1.45713	9.04038x10-23	1.98335x10-21	1.37678	12060.5	8759.89
223.07257	400	400-8	HMDB0245967	(3-Phenoxyphenyl)methanol	Benzene and substituted derivatives	C13H12O2	+Na	1.94732	Pos	1.45713	9.04038x10-23	1.98335x10-21	1.37678	12060.5	8759.89
223.07257	400	400-5	HMDB0244965	2-[Hydroxy(phenyl)methyl]phenol	Benzene and substituted derivatives	C13H12O2	+Na	1.94732	Pos	1.45713	9.04038x10-23	1.98335x10-21	1.37678	12060.5	8759.89
223.07257	400	400-7	HMDB0245676	1-(4-Methoxy-1-naphthyl)ethanone	Naphthalenes	C13H12O2	+Na	1.94732	Pos	1.45713	9.04038x10-23	1.98335x10-21	1.37678	12060.5	8759.89
223.07257	400	400-11	HMDB0303824	(7E)-4-Deoxy-2,3-dihydromycosinol	Organooxygen compounds	C13H12O2	+Na	1.94732	Pos	1.45713	9.04038x10-23	1.98335x10-21	1.37678	12060.5	8759.89
147.11263	122	122-2	HMDB0000716	L-Pipecolic acid	Carboxylic acids and derivatives	C6H11NO2	+NH4	1.34899	Pos	1.42296	6.22290x10-17	7.33868x10-16	0.737458	9719.85	13180.2
147.11263	122	122-1	HMDB0000070	Pipecolic acid	Carboxylic acids and derivatives	C6H11NO2	+NH4	1.34899	Pos	1.42296	6.22290x10-17	7.33868x10-16	0.737458	9719.85	13180.2
147.11263	122	122-4	HMDB0029444	2-Pyrrolidineacetic acid	Pyrrolidines	C6H11NO2	+NH4	1.34899	Pos	1.42296	6.22290x10-17	7.33868x10-16	0.737458	9719.85	13180.2
147.11263	122	122-3	HMDB0005960	D-Pipecolic acid	Carboxylic acids and derivatives	C6H11NO2	+NH4	1.34899	Pos	1.42296	6.22290x10-17	7.33868x10-16	0.737458	9719.85	13180.2
869.45568	2705	2705-1	HMDB0274423	PGP(a-15:0/18:1(12Z)-2OH(9,10))	Unclassified	C39H76O15P2	+Na	0.595526	Pos	1.40929	5.45311x10-21	1.06583x10-19	0.217684	818.393	3759.54
869.45568	2705	2705-2	HMDB0274424	PGP(18:1(12Z)-2OH(9,10)/a-15:0)	Unclassified	C39H76O15P2	+Na	0.595526	Pos	1.40929	5.45311x10-21	1.06583x10-19	0.217684	818.393	3759.54
869.45568	2705	2705-3	HMDB0275151	PGP(i-15:0/18:1(12Z)-2OH(9,10))	Unclassified	C39H76O15P2	+Na	0.595526	Pos	1.40929	5.45311x10-21	1.06583x10-19	0.217684	818.393	3759.54
869.45568	2705	2705-4	HMDB0275152	PGP(18:1(12Z)-2OH(9,10)/i-15:0)	Unclassified	C39H76O15P2	+Na	0.595526	Pos	1.40929	5.45311x10-21	1.06583x10-19	0.217684	818.393	3759.54
112.01585	40	40-1	HMDB0240707	Aminomethylphosphonic acid	Organic phosphonic acids and derivatives	CH6NO3P	+H	0.312948	Pos	1.398	3.89045x10-15	3.76778x10-14	1.2133	20136	16596
253.11914	519	519-6	HMDB0029098	Tyrosyl-Alanine	Carboxylic acids and derivatives	C12H16N2O4	+H	3.21068	Pos	1.37514	8.45760x10-24	2.06635x10-22	1.2726	12995.9	10212.1
253.11914	519	519-1	HMDB0013940	3'-Hydroxyhexobarbital	Diazines	C12H16N2O4	+H	3.21068	Pos	1.37514	8.45760x10-24	2.06635x10-22	1.2726	12995.9	10212.1
253.11914	519	519-2	HMDB0013941	Epoxy-hexobarbital	Diazines	C12H16N2O4	+H	3.21068	Pos	1.37514	8.45760x10-24	2.06635x10-22	1.2726	12995.9	10212.1
253.11914	519	519-4	HMDB0029004	Phenylalanylserine	Carboxylic acids and derivatives	C12H16N2O4	+H	3.21068	Pos	1.37514	8.45760x10-24	2.06635x10-22	1.2726	12995.9	10212.1
253.11914	519	519-5	HMDB0029046	Serylphenylalanine	Carboxylic acids and derivatives	C12H16N2O4	+H	3.21068	Pos	1.37514	8.45760x10-24	2.06635x10-22	1.2726	12995.9	10212.1
253.11914	519	519-3	HMDB0028699	Alanyltyrosine	Carboxylic acids and derivatives	C12H16N2O4	+H	3.21068	Pos	1.37514	8.45760x10-24	2.06635x10-22	1.2726	12995.9	10212.1
241.08280	472	472-2	HMDB0250015	(S,E)-2-(5-Hydroxy-8,9-dihydro-5H-benzo[7]annulen-6(7H)-ylidene)acetic acid	Unclassified	C13H14O3	+Na	3.24189	Pos	1.37436	2.21993x10-26	6.81835x10-25	1.36835	9931.66	7258.15
241.08280	472	472-1	HMDB0040358	(R)-Bitalin A	Benzene and substituted derivatives	C13H14O3	+Na	3.24189	Pos	1.37436	2.21993x10-26	6.81835x10-25	1.36835	9931.66	7258.15
241.08280	472	472-3	HMDB0256835	Propranolol glycol	Naphthalenes	C13H14O3	+Na	3.24189	Pos	1.37436	2.21993x10-26	6.81835x10-25	1.36835	9931.66	7258.15
770.39924	2464	2464-2	HMDB0260719	PE(5-iso PGF2VI/14:1(9Z))	Unclassified	C37H66NO11P	+K	1.64486	Pos	1.35998	9.19109x10-21	1.73070x10-19	0.324448	1344.95	4145.36
770.39924	2464	2464-1	HMDB0260718	PE(14:1(9Z)/5-iso PGF2VI)	Unclassified	C37H66NO11P	+K	1.64486	Pos	1.35998	9.19109x10-21	1.73070x10-19	0.324448	1344.95	4145.36
225.08804	413	413-2	HMDB0031663	3-(3-Methylbutylidene)-1(3H)-isobenzofuranone	Isocoumarans	C13H14O2	+Na	2.67043	Pos	1.33363	5.50592x10-22	1.11677x10-20	1.28022	12495.7	9760.57
225.08804	413	413-3	HMDB0259119	Tremetone	Benzene and substituted derivatives	C13H14O2	+Na	2.67043	Pos	1.33363	5.50592x10-22	1.11677x10-20	1.28022	12495.7	9760.57
225.08804	413	413-1	HMDB0030816	6-Acetyl-2,2-dimethyl-2H-1-benzopyran	Benzopyrans	C13H14O2	+Na	2.67043	Pos	1.33363	5.50592x10-22	1.11677x10-20	1.28022	12495.7	9760.57
803.41702	2578	2578-1	HMDB0250399	Cogoxin	Steroids and steroid derivatives	C41H64O14	+Na	2.2465	Pos	1.33171	1.86938x10-22	4.01917x10-21	0.381911	1607.29	4208.55
803.41702	2578	2578-2	HMDB0252731	Gitoxin	Steroids and steroid derivatives	C41H64O14	+Na	2.2465	Pos	1.33171	1.86938x10-22	4.01917x10-21	0.381911	1607.29	4208.55
667.93650	1922	1922-1	HMDB0059647	Adenosine 5'-pentaphosphate	Purine nucleotides	C10H18N5O19P5	+H	1.13597	Pos	1.33093	9.33773x10-21	1.73070x10-19	0.377036	1630.75	4325.18
146.16487	118	118-1	HMDB0001257	Spermidine	Organonitrogen compounds	C7H19N3	+H	2.31385	Pos	1.32528	6.82588x10-04	1.29415x10-03	1.10866	61710.7	55662.3
453.20877	842	842-1	HMDB0253951	Lactose-lysine	Saccharolipids	C18H34N2O12	+H-H2O	0.471739	Pos	1.3235	1.19586x10-35	8.03467x10-34	0.452716	1800.39	3976.86
825.43017	2630	2630-1	HMDB0033404	Quillaic acid 3-[galactosyl-(1->2)-glucuronide]	Prenol lipids	C42H64O16	+H	4.11296	Pos	1.32097	1.63090x10-19	2.46932x10-18	0.380039	1598.22	4205.41
825.43017	2630	2630-2	HMDB0036943	Oleragenoside	Prenol lipids	C42H64O16	+H	4.11296	Pos	1.32097	1.63090x10-19	2.46932x10-18	0.380039	1598.22	4205.41
825.43017	2630	2630-3	HMDB0039448	Licoricesaponin J2	Prenol lipids	C42H64O16	+H	4.11296	Pos	1.32097	1.63090x10-19	2.46932x10-18	0.380039	1598.22	4205.41
825.43017	2630	2630-4	HMDB0039512	Periandrin III	Prenol lipids	C42H64O16	+H	4.11296	Pos	1.32097	1.63090x10-19	2.46932x10-18	0.380039	1598.22	4205.41
703.35755	2122	2122-1	HMDB0262739	PA(10:0/PGF1alpha)	Unclassified	C33H61O11P	+K	1.07765	Pos	1.31366	2.38107x10-20	3.93792x10-19	0.357181	1440.52	4033.04
703.35755	2122	2122-2	HMDB0262740	PA(PGF1alpha/10:0)	Unclassified	C33H61O11P	+K	1.07765	Pos	1.31366	2.38107x10-20	3.93792x10-19	0.357181	1440.52	4033.04
409.18217	816	816-2	HMDB0030370	Citroside A	Prenol lipids	C19H30O8	+Na	2.80475	Pos	1.31258	4.43929x10-36	3.18149x10-34	0.513671	2258.31	4396.42
409.18217	816	816-3	HMDB0035212	Sonchuionoside C	Prenol lipids	C19H30O8	+Na	2.80475	Pos	1.31258	4.43929x10-36	3.18149x10-34	0.513671	2258.31	4396.42
409.18217	816	816-1	HMDB0029772	Corchoionol C 9-glucoside	Fatty Acyls	C19H30O8	+Na	2.80475	Pos	1.31258	4.43929x10-36	3.18149x10-34	0.513671	2258.31	4396.42
209.05683	343	343-6	HMDB0246987	2-Naphthylacetic acid	Naphthalenes	C12H10O2	+Na	2.38894	Pos	1.30287	1.10270x10-19	1.69343x10-18	1.29886	11788.6	9076.14
209.05683	343	343-1	HMDB0032708	1-Naphthaleneacetic acid	Naphthalenes	C12H10O2	+Na	2.38894	Pos	1.30287	1.10270x10-19	1.69343x10-18	1.29886	11788.6	9076.14
209.05683	343	343-5	HMDB0246489	4-Methoxy-1-naphthaldehyde	Naphthalenes	C12H10O2	+Na	2.38894	Pos	1.30287	1.10270x10-19	1.69343x10-18	1.29886	11788.6	9076.14
209.05683	343	343-2	HMDB0243757	[1,1'-Biphenyl]-2,3'-diol	Benzene and substituted derivatives	C12H10O2	+Na	2.38894	Pos	1.30287	1.10270x10-19	1.69343x10-18	1.29886	11788.6	9076.14
209.05683	343	343-8	HMDB0301834	Eutypine	Organooxygen compounds	C12H10O2	+Na	2.38894	Pos	1.30287	1.10270x10-19	1.69343x10-18	1.29886	11788.6	9076.14
209.05683	343	343-4	HMDB0245250	2-Naphthyl acetate	Naphthalenes	C12H10O2	+Na	2.38894	Pos	1.30287	1.10270x10-19	1.69343x10-18	1.29886	11788.6	9076.14
209.05683	343	343-3	HMDB0243958	1-Naphthyl acetate	Naphthalenes	C12H10O2	+Na	2.38894	Pos	1.30287	1.10270x10-19	1.69343x10-18	1.29886	11788.6	9076.14
209.05683	343	343-7	HMDB0247086	6-Methoxy-2-naphthaldehyde	Naphthalenes	C12H10O2	+Na	2.38894	Pos	1.30287	1.10270x10-19	1.69343x10-18	1.29886	11788.6	9076.14
595.26554	1210	1210-1	HMDB0250581	Cucurbitacin E	Steroids and steroid derivatives	C32H44O8	+K	2.20498	Pos	1.30049	2.88283x10-15	2.84316x10-14	1.22653	16218.9	13223.4
319.12087	734	734-1	HMDB0245477	2,4,5-Triphenylimidazole	Azoles	C21H16N2	+Na	0.700009	Pos	1.29272	5.57576x10-23	1.27531x10-21	1.30822	10701.2	8179.97
152.04708	137	137-1	HMDB0011664	3-Methylene-indolenine	Indoles and derivatives	C9H7N	+Na	0.108434	Pos	1.28184	4.23934x10-23	9.90716x10-22	1.35839	9629.66	7089
647.33186	1751	1751-1	HMDB0266663	PA(8:0/22:6(5Z,7Z,10Z,13Z,16Z,19Z)-OH(4))	Unclassified	C33H53O9P	+Na	0.114813	Pos	1.28087	2.80794x10-17	3.43016x10-16	0.489762	2627.37	5364.59
647.33186	1751	1751-3	HMDB0266665	PA(8:0/22:6(4Z,8Z,10Z,13Z,16Z,19Z)-OH(7))	Unclassified	C33H53O9P	+Na	0.114813	Pos	1.28087	2.80794x10-17	3.43016x10-16	0.489762	2627.37	5364.59
647.33186	1751	1751-5	HMDB0266667	PA(8:0/22:6(4Z,7Z,10Z,12E,16Z,19Z)-OH(14))	Unclassified	C33H53O9P	+Na	0.114813	Pos	1.28087	2.80794x10-17	3.43016x10-16	0.489762	2627.37	5364.59
647.33186	1751	1751-2	HMDB0266664	PA(22:6(5Z,7Z,10Z,13Z,16Z,19Z)-OH(4)/8:0)	Unclassified	C33H53O9P	+Na	0.114813	Pos	1.28087	2.80794x10-17	3.43016x10-16	0.489762	2627.37	5364.59
647.33186	1751	1751-7	HMDB0266669	PA(8:0/22:6(4Z,7Z,10Z,13E,15E,19Z)-OH(17))	Unclassified	C33H53O9P	+Na	0.114813	Pos	1.28087	2.80794x10-17	3.43016x10-16	0.489762	2627.37	5364.59
647.33186	1751	1751-4	HMDB0266666	PA(22:6(4Z,8Z,10Z,13Z,16Z,19Z)-OH(7)/8:0)	Unclassified	C33H53O9P	+Na	0.114813	Pos	1.28087	2.80794x10-17	3.43016x10-16	0.489762	2627.37	5364.59
647.33186	1751	1751-9	HMDB0266673	PA(8:0/22:5(4Z,7Z,10Z,13Z,19Z)-O(16,17))	Unclassified	C33H53O9P	+Na	0.114813	Pos	1.28087	2.80794x10-17	3.43016x10-16	0.489762	2627.37	5364.59
647.33186	1751	1751-10	HMDB0266674	PA(22:5(4Z,7Z,10Z,13Z,19Z)-O(16,17)/8:0)	Unclassified	C33H53O9P	+Na	0.114813	Pos	1.28087	2.80794x10-17	3.43016x10-16	0.489762	2627.37	5364.59
647.33186	1751	1751-6	HMDB0266668	PA(22:6(4Z,7Z,10Z,12E,16Z,19Z)-OH(14)/8:0)	Unclassified	C33H53O9P	+Na	0.114813	Pos	1.28087	2.80794x10-17	3.43016x10-16	0.489762	2627.37	5364.59
647.33186	1751	1751-8	HMDB0266670	PA(22:6(4Z,7Z,10Z,13E,15E,19Z)-OH(17)/8:0)	Unclassified	C33H53O9P	+Na	0.114813	Pos	1.28087	2.80794x10-17	3.43016x10-16	0.489762	2627.37	5364.59
257.06020	534	534-1	HMDB0032660	(2Z,4'Z)-2-(5-Methylthio-4-penten-2-ynylidene)-1,6-dioxaspiro[4.4]non-3-ene	Organooxygen compounds	C13H14O2S	+Na	1.90498	Pos	1.27557	8.36809x10-23	1.87410x10-21	1.2962	10680.5	8239.83
497.23490	865	865-1	HMDB0249158	Betamethasone 17-benzoate	Steroids and steroid derivatives	C29H33FO6	+H	2.87074	Pos	1.2658	7.83691x10-38	7.02057x10-36	0.343728	1015.65	2954.8
152.02197	135	135-1	HMDB0243777	1-(2-Chloroethyl)-1-nitrosourea	Organic carbonic acids and derivatives	C3H6ClN3O2	+H	1.08204	Pos	1.26562	2.35684x10-24	6.33402x10-23	1.64023	6024.87	3673.19
858.44943	2692	2692-1	HMDB0281766	PS(18:3(6Z,9Z,12Z)/PGJ2)	Unclassified	C44H70NO12P	+Na	3.90689	Pos	1.26474	2.21424x10-20	3.71922x10-19	0.338784	1250.16	3690.14
858.44943	2692	2692-2	HMDB0281767	PS(PGJ2/18:3(6Z,9Z,12Z))	Unclassified	C44H70NO12P	+Na	3.90689	Pos	1.26474	2.21424x10-20	3.71922x10-19	0.338784	1250.16	3690.14
858.44943	2692	2692-3	HMDB0281870	PS(18:3(9Z,12Z,15Z)/PGJ2)	Unclassified	C44H70NO12P	+Na	3.90689	Pos	1.26474	2.21424x10-20	3.71922x10-19	0.338784	1250.16	3690.14
858.44943	2692	2692-4	HMDB0281871	PS(PGJ2/18:3(9Z,12Z,15Z))	Unclassified	C44H70NO12P	+Na	3.90689	Pos	1.26474	2.21424x10-20	3.71922x10-19	0.338784	1250.16	3690.14
858.44943	2692	2692-5	HMDB0281977	PS(18:4(6Z,9Z,12Z,15Z)/20:4(6Z,8E,10E,14Z)-2OH(5S,12R))	Unclassified	C44H70NO12P	+Na	3.90689	Pos	1.26474	2.21424x10-20	3.71922x10-19	0.338784	1250.16	3690.14
858.44943	2692	2692-6	HMDB0281978	PS(20:4(6Z,8E,10E,14Z)-2OH(5S,12R)/18:4(6Z,9Z,12Z,15Z))	Unclassified	C44H70NO12P	+Na	3.90689	Pos	1.26474	2.21424x10-20	3.71922x10-19	0.338784	1250.16	3690.14
858.44943	2692	2692-7	HMDB0282013	PS(18:4(6Z,9Z,12Z,15Z)/20:4(6E,8Z,11Z,13E)-2OH(5S,15S))	Unclassified	C44H70NO12P	+Na	3.90689	Pos	1.26474	2.21424x10-20	3.71922x10-19	0.338784	1250.16	3690.14
858.44943	2692	2692-8	HMDB0282014	PS(20:4(6E,8Z,11Z,13E)-2OH(5S,15S)/18:4(6Z,9Z,12Z,15Z))	Unclassified	C44H70NO12P	+Na	3.90689	Pos	1.26474	2.21424x10-20	3.71922x10-19	0.338784	1250.16	3690.14
858.44943	2692	2692-9	HMDB0282015	PS(18:4(6Z,9Z,12Z,15Z)/20:4(8Z,11Z,14Z,17Z)-2OH(5S,6R))	Unclassified	C44H70NO12P	+Na	3.90689	Pos	1.26474	2.21424x10-20	3.71922x10-19	0.338784	1250.16	3690.14
858.44943	2692	2692-10	HMDB0282016	PS(20:4(8Z,11Z,14Z,17Z)-2OH(5S,6R)/18:4(6Z,9Z,12Z,15Z))	Unclassified	C44H70NO12P	+Na	3.90689	Pos	1.26474	2.21424x10-20	3.71922x10-19	0.338784	1250.16	3690.14
181.06213	241	241-1	HMDB0032861	2-Methoxynaphthalene	Naphthalenes	C11H10O	+Na	1.38607	Pos	1.26414	1.13802x10-27	4.07789x10-26	1.53588	6430.25	4186.69
181.06213	241	241-3	HMDB0060322	1-Hydroxymethylnaphthalene	Naphthalenes	C11H10O	+Na	1.38607	Pos	1.26414	1.13802x10-27	4.07789x10-26	1.53588	6430.25	4186.69
181.06213	241	241-2	HMDB0060303	(2-Naphthyl)methanol	Naphthalenes	C11H10O	+Na	1.38607	Pos	1.26414	1.13802x10-27	4.07789x10-26	1.53588	6430.25	4186.69
781.40379	2507	2507-1	HMDB0060732	25-O-Desacetyl rifabutin	Naphthofurans	C41H56N4O11	+H	2.47168	Pos	1.25304	7.34817x10-20	1.16166x10-18	0.334729	1207.46	3607.26
365.15622	784	784-2	HMDB0255070	N-acetylmuramoyl-L-alanine	Organooxygen compounds	C14H24N2O9	+H	2.0477	Pos	1.25256	2.08394x10-26	6.58894x10-25	0.578066	2982.33	5159.15
365.15622	784	784-3	HMDB0255071	n-acetylmuramyl-l-alanine	Carboxylic acids and derivatives	C14H24N2O9	+H	2.0477	Pos	1.25256	2.08394x10-26	6.58894x10-25	0.578066	2982.33	5159.15
365.15622	784	784-1	HMDB0060494	N-Acetylmuramoyl-Ala	Organooxygen compounds	C14H24N2O9	+H	2.0477	Pos	1.25256	2.08394x10-26	6.58894x10-25	0.578066	2982.33	5159.15
203.06787	316	316-2	HMDB0032174	Benzaldehyde glyceryl acetal	Dioxanes	C10H12O3	+Na	0.0607297	Pos	1.23883	8.61918x10-25	2.45124x10-23	1.37065	8243.89	6014.59
203.06787	316	316-5	HMDB0062773	10-hydroxy-(2E,8E)-decadien-4-ynoic Acid	Fatty Acyls	C10H12O3	+Na	0.0607297	Pos	1.23883	8.61918x10-25	2.45124x10-23	1.37065	8243.89	6014.59
203.06787	316	316-1	HMDB0031240	2-Phenyl-1,3-dioxolane-4-methanol	Benzene and substituted derivatives	C10H12O3	+Na	0.0607297	Pos	1.23883	8.61918x10-25	2.45124x10-23	1.37065	8243.89	6014.59
203.06787	316	316-3	HMDB0032574	Propylparaben	Benzene and substituted derivatives	C10H12O3	+Na	0.0607297	Pos	1.23883	8.61918x10-25	2.45124x10-23	1.37065	8243.89	6014.59
203.06787	316	316-4	HMDB0037733	Propyl 2-furanacrylate	Fatty Acyls	C10H12O3	+Na	0.0607297	Pos	1.23883	8.61918x10-25	2.45124x10-23	1.37065	8243.89	6014.59
669.36151	1935	1935-2	HMDB0037827	Monoglucuronylglycyrrhetinic acid	Prenol lipids	C36H54O10	+Na	0.884351	Pos	1.22782	8.27103x10-18	1.07125x10-16	0.315101	1134.87	3601.62
669.36151	1935	1935-1	HMDB0034520	Gypsogenin 3-O-b-D-glucuronide	Prenol lipids	C36H54O10	+Na	0.884351	Pos	1.22782	8.27103x10-18	1.07125x10-16	0.315101	1134.87	3601.62
847.69322	2674	2674-1	HMDB0007960	PC(39:1)	Glycerophospholipids	C47H92NO8P	+NH4	3.94079	Pos	1.22433	5.38784x10-22	1.11383x10-20	0.274898	829.358	3016.97
847.69322	2674	2674-2	HMDB0009014	PE(42:1)	Glycerophospholipids	C47H92NO8P	+NH4	3.94079	Pos	1.22433	5.38784x10-22	1.11383x10-20	0.274898	829.358	3016.97
208.08133	338	338-1	HMDB0240294	2-O-Methylascorbic acid	Dihydrofurans	C7H10O6	+NH4	1.12815	Pos	1.22413	9.83457x10-25	2.71081x10-23	1.42872	7374.1	5161.32
159.02729	164	164-1	HMDB0031160	1-Pentanesulfenothioic acid	Sulfenyl compounds	C5H12S2	+Na	0.191179	Pos	1.22222	5.33304x10-29	2.04751x10-27	1.57283	5480.85	3484.71
659.13118	1858	1858-1	HMDB0038936	Garcilivin A	Benzopyrans	C36H28O10	+K	0.470867	Pos	1.19825	2.44063x10-16	2.67722x10-15	0.371936	1435.1	3858.47
659.13118	1858	1858-2	HMDB0038937	Garcilivin B	Benzopyrans	C36H28O10	+K	0.470867	Pos	1.19825	2.44063x10-16	2.67722x10-15	0.371936	1435.1	3858.47
798.53958	2564	2564-1	HMDB0009644	PE(22:6)	Glycerophospholipids	C45H78NO7P	+Na	1.71032	Pos	1.19541	3.83018x10-08	1.43966x10-07	1.28218	13766.6	10736.9
798.53958	2564	2564-2	HMDB0011394	PE(40:7)	Glycerophospholipids	C45H78NO7P	+Na	1.71032	Pos	1.19541	3.83018x10-08	1.43966x10-07	1.28218	13766.6	10736.9
233.02025	439	439-1	HMDB0256496	Phosphovanillin	Organic phosphoric acids and derivatives	C8H9O6P	+H	3.21657	Pos	1.19052	1.95972x10-16	2.17185x10-15	1.24914	12794.9	10243
187.07280	260	260-9	HMDB0033945	2-Phenylethyl acetate	Benzene and substituted derivatives	C10H12O2	+Na	0.967998	Pos	1.17848	7.50956x10-14	6.02446x10-13	1.16385	18905.1	16243.6
187.07280	260	260-1	HMDB0000329	2-Phenylbutyric acid	Benzene and substituted derivatives	C10H12O2	+Na	0.967998	Pos	1.17848	7.50956x10-14	6.02446x10-13	1.16385	18905.1	16243.6
187.07280	260	260-3	HMDB0001955	3-Phenylbutyric acid	Phenylpropanoic acids	C10H12O2	+Na	0.967998	Pos	1.17848	7.50956x10-14	6.02446x10-13	1.16385	18905.1	16243.6
187.07280	260	260-10	HMDB0034732	Thymoquinone	Organooxygen compounds	C10H12O2	+Na	0.967998	Pos	1.17848	7.50956x10-14	6.02446x10-13	1.16385	18905.1	16243.6
187.07280	260	260-4	HMDB0030060	Methyl 3-phenylpropanoate	Fatty Acyls	C10H12O2	+Na	0.967998	Pos	1.17848	7.50956x10-14	6.02446x10-13	1.16385	18905.1	16243.6
187.07280	260	260-7	HMDB0032618	Ethyl phenylacetate	Benzene and substituted derivatives	C10H12O2	+Na	0.967998	Pos	1.17848	7.50956x10-14	6.02446x10-13	1.16385	18905.1	16243.6
187.07280	260	260-2	HMDB0000543	Benzenebutanoic acid	Benzene and substituted derivatives	C10H12O2	+Na	0.967998	Pos	1.17848	7.50956x10-14	6.02446x10-13	1.16385	18905.1	16243.6
187.07280	260	260-8	HMDB0032620	1-Phenylethyl acetate	Benzene and substituted derivatives	C10H12O2	+Na	0.967998	Pos	1.17848	7.50956x10-14	6.02446x10-13	1.16385	18905.1	16243.6
187.07280	260	260-5	HMDB0030063	Benzyl propionate	Benzene and substituted derivatives	C10H12O2	+Na	0.967998	Pos	1.17848	7.50956x10-14	6.02446x10-13	1.16385	18905.1	16243.6
187.07280	260	260-6	HMDB0032336	3-Hydroxy-4-phenylbutan-2-one	Benzene and substituted derivatives	C10H12O2	+Na	0.967998	Pos	1.17848	7.50956x10-14	6.02446x10-13	1.16385	18905.1	16243.6
541.26086	888	888-1	HMDB0031935	Blumenol C O-[rhamnosyl-(1->6)-glucoside]	Fatty Acyls	C25H42O11	+Na	2.04918	Pos	1.17557	1.02465x10-34	5.50747x10-33	0.298161	747.781	2507.97
814.42410	2606	2606-1	HMDB0260702	PE(14:1(9Z)/6 keto-PGF1alpha)	Unclassified	C39H70NO12P	+K	3.22167	Pos	1.17285	6.41550x10-15	5.94540x10-14	0.397924	1558.43	3916.4
814.42410	2606	2606-2	HMDB0260703	PE(6 keto-PGF1alpha/14:1(9Z))	Unclassified	C39H70NO12P	+K	3.22167	Pos	1.17285	6.41550x10-15	5.94540x10-14	0.397924	1558.43	3916.4
814.42410	2606	2606-3	HMDB0260712	PE(14:1(9Z)/TXB2)	Unclassified	C39H70NO12P	+K	3.22167	Pos	1.17285	6.41550x10-15	5.94540x10-14	0.397924	1558.43	3916.4
814.42410	2606	2606-4	HMDB0260713	PE(TXB2/14:1(9Z))	Unclassified	C39H70NO12P	+K	3.22167	Pos	1.17285	6.41550x10-15	5.94540x10-14	0.397924	1558.43	3916.4
609.31490	1360	1360-1	HMDB0248466	Inuline	Prenol lipids	C32H46N2O8	+Na	0.289894	Pos	1.15414	3.19608x10-16	3.47049x10-15	0.412902	1545.02	3741.86
638.32631	1668	1668-1	HMDB0258927	Tetrapeptide	Peptidomimetics	C27H40N8O9	+NH4	0.798459	Pos	1.15015	3.84391x10-10	1.94000x10-09	0.469509	2339.17	4982.15
162.11244	172	172-1	HMDB0244982	beta-Hydroxy-gamma-trimethylaminobutyric acid	Carboxylic acids and derivatives	C7H15NO3	+H	0.200889	Pos	1.14876	7.10373x10-11	3.81921x10-10	1.19222	17932.3	15041.1
162.11244	172	172-2	HMDB0254990	N-(2-Hydroxyethyl)valine	Carboxylic acids and derivatives	C7H15NO3	+H	0.200889	Pos	1.14876	7.10373x10-11	3.81921x10-10	1.19222	17932.3	15041.1
836.43625	2656	2656-1	HMDB0254710	midecamycin	Organooxygen compounds	C41H67NO15	+Na	4.83253	Pos	1.14794	3.03227x10-17	3.62188x10-16	0.377122	1332.46	3533.22
836.43625	2656	2656-2	HMDB0255523	Neoisomidecamycin	Organooxygen compounds	C41H67NO15	+Na	4.83253	Pos	1.14794	3.03227x10-17	3.62188x10-16	0.377122	1332.46	3533.22
280.09122	634	634-1	HMDB0000086	Glycerophosphocholine	Glycerophospholipids	C8H20NO6P	+Na	3.01529	Pos	1.13914	1.23116x10-27	4.26934x10-26	1.37862	6512	4723.56
231.09878	436	436-3	HMDB0030681	5-Deoxydiplosporin	Pyrans	C12H16O3	+Na	1.93424	Pos	1.13858	2.97349x10-17	3.59157x10-16	1.25121	11161.7	8920.71
231.09878	436	436-1	HMDB0030150	Jasmine ketolactone	Oxocins	C12H16O3	+Na	1.93424	Pos	1.13858	2.97349x10-17	3.59157x10-16	1.25121	11161.7	8920.71
231.09878	436	436-2	HMDB0030197	(Z)-3-Oxo-2-(2-pentenyl)-1-cyclopenteneacetic acid	Organooxygen compounds	C12H16O3	+Na	1.93424	Pos	1.13858	2.97349x10-17	3.59157x10-16	1.25121	11161.7	8920.71
880.21165	2718	2718-1	HMDB0011660	2-Methylhexanoyl-CoA	Fatty Acyls	C28H48N7O17P3S	+H	0.34867	Pos	1.13854	4.02200x10-19	5.84278x10-18	0.303049	909.084	2999.79
880.21165	2718	2718-2	HMDB0012969	Heptanoyl-CoA	Thiocyanates	C28H48N7O17P3S	+H	0.34867	Pos	1.13854	4.02200x10-19	5.84278x10-18	0.303049	909.084	2999.79
902.47523	2745	2745-1	HMDB0035507	Schidigerasaponin B1	Steroids and steroid derivatives	C44H68O18	+NH4	0.875664	Pos	1.12672	4.99433x10-18	6.71113x10-17	0.243191	665.12	2734.97
267.09891	584	584-5	HMDB0034723	Encelin	Prenol lipids	C15H16O3	+Na	1.17966	Pos	1.12604	2.43520x10-22	5.13302x10-21	1.38769	6915.19	4983.22
267.09891	584	584-3	HMDB0031925	5-Hydroxy-2-(5-methyl-1-oxo-4-hexenyl)benzofuran	Benzofurans	C15H16O3	+Na	1.17966	Pos	1.12604	2.43520x10-22	5.13302x10-21	1.38769	6915.19	4983.22
267.09891	584	584-1	HMDB0030636	Batatasin III	Stilbenes	C15H16O3	+Na	1.17966	Pos	1.12604	2.43520x10-22	5.13302x10-21	1.38769	6915.19	4983.22
267.09891	584	584-4	HMDB0032641	Batatasin IV	Stilbenes	C15H16O3	+Na	1.17966	Pos	1.12604	2.43520x10-22	5.13302x10-21	1.38769	6915.19	4983.22
267.09891	584	584-2	HMDB0030731	3-(1,1-Dimethylallyl)herniarin	Coumarins and derivatives	C15H16O3	+Na	1.17966	Pos	1.12604	2.43520x10-22	5.13302x10-21	1.38769	6915.19	4983.22
267.09891	584	584-6	HMDB0038548	Glandulone B	Prenol lipids	C15H16O3	+Na	1.17966	Pos	1.12604	2.43520x10-22	5.13302x10-21	1.38769	6915.19	4983.22
229.08320	429	429-1	HMDB0015023	Pemirolast	Pyridopyrimidines	C10H8N6O	+H	0.208242	Pos	1.12368	1.49653x10-20	2.68129x10-19	1.29215	8882.98	6874.56
325.17702	748	748-10	HMDB0033125	[8]-Dehydroshogaol	Cinnamic acids and derivatives	C19H26O3	+Na	1.34948	Pos	1.10782	9.13426x10-20	1.42309x10-18	1.30778	8246.02	6305.35
325.17702	748	748-8	HMDB0012782	4-Methoxy-17beta-estradiol	Steroids and steroid derivatives	C19H26O3	+Na	1.34948	Pos	1.10782	9.13426x10-20	1.42309x10-18	1.30778	8246.02	6305.35
325.17702	748	748-18	HMDB0243551	Bioallethrin	Fatty Acyls	C19H26O3	+Na	1.34948	Pos	1.10782	9.13426x10-20	1.42309x10-18	1.30778	8246.02	6305.35
325.17702	748	748-19	HMDB0244360	(8R,9R,10S,11S,13R,14R)-11-Hydroxy-10,13-dimethyl-2,6,7,8,9,11,12,14,15,16-decahydro-1H-cyclopenta[a]phenanthrene-3,17-dione	Steroids and steroid derivatives	C19H26O3	+Na	1.34948	Pos	1.10782	9.13426x10-20	1.42309x10-18	1.30778	8246.02	6305.35
325.17702	748	748-12	HMDB0034167	Falcarindiol 3-acetate	Fatty Acyls	C19H26O3	+Na	1.34948	Pos	1.10782	9.13426x10-20	1.42309x10-18	1.30778	8246.02	6305.35
325.17702	748	748-21	HMDB0245198	2-Methoxy-17alpha-estradiol	Steroids and steroid derivatives	C19H26O3	+Na	1.34948	Pos	1.10782	9.13426x10-20	1.42309x10-18	1.30778	8246.02	6305.35
325.17702	748	748-22	HMDB0246470	(8R,9S,10R,13S,14S)-4-Hydroxy-10,13-dimethyl-1,6,7,8,9,10,11,12,13,14,15,16-dodecahydro-2H-cyclopenta[a]phenanthrene-3,17-dione	Steroids and steroid derivatives	C19H26O3	+Na	1.34948	Pos	1.10782	9.13426x10-20	1.42309x10-18	1.30778	8246.02	6305.35
325.17702	748	748-23	HMDB0246490	4-Methoxy-17alpha-estradiol	Steroids and steroid derivatives	C19H26O3	+Na	1.34948	Pos	1.10782	9.13426x10-20	1.42309x10-18	1.30778	8246.02	6305.35
325.17702	748	748-15	HMDB0040927	2-Hexyl-5-[2-(4-hydroxy-3-methoxyphenyl)ethyl]furan	Fatty Acyls	C19H26O3	+Na	1.34948	Pos	1.10782	9.13426x10-20	1.42309x10-18	1.30778	8246.02	6305.35
325.17702	748	748-25	HMDB0251855	EPIMESTROL	Steroids and steroid derivatives	C19H26O3	+Na	1.34948	Pos	1.10782	9.13426x10-20	1.42309x10-18	1.30778	8246.02	6305.35
325.17702	748	748-17	HMDB0242733	4-Androsten-4-ol-3,17-dione	Steroids and steroid derivatives	C19H26O3	+Na	1.34948	Pos	1.10782	9.13426x10-20	1.42309x10-18	1.30778	8246.02	6305.35
325.17702	748	748-4	HMDB0003959	19-Oxotestosterone	Steroids and steroid derivatives	C19H26O3	+Na	1.34948	Pos	1.10782	9.13426x10-20	1.42309x10-18	1.30778	8246.02	6305.35
325.17702	748	748-5	HMDB0006771	7a-Hydroxyandrost-4-ene-3,17-dione	Steroids and steroid derivatives	C19H26O3	+Na	1.34948	Pos	1.10782	9.13426x10-20	1.42309x10-18	1.30778	8246.02	6305.35
325.17702	748	748-20	HMDB0244364	11-Ketotestosterone	Steroids and steroid derivatives	C19H26O3	+Na	1.34948	Pos	1.10782	9.13426x10-20	1.42309x10-18	1.30778	8246.02	6305.35
325.17702	748	748-7	HMDB0006774	16a-Hydroxyandrost-4-ene-3,17-dione	Steroids and steroid derivatives	C19H26O3	+Na	1.34948	Pos	1.10782	9.13426x10-20	1.42309x10-18	1.30778	8246.02	6305.35
325.17702	748	748-13	HMDB0036696	Yucalexin B'11	Organooxygen compounds	C19H26O3	+Na	1.34948	Pos	1.10782	9.13426x10-20	1.42309x10-18	1.30778	8246.02	6305.35
325.17702	748	748-9	HMDB0031038	(2Z,8S,9Z)-2,9-Heptadecadiene-8-hydroxy-4,6-diyne-1-yl acetate	Fatty Acyls	C19H26O3	+Na	1.34948	Pos	1.10782	9.13426x10-20	1.42309x10-18	1.30778	8246.02	6305.35
325.17702	748	748-24	HMDB0247266	7-Keto-dehydroepiandrosterone	Steroids and steroid derivatives	C19H26O3	+Na	1.34948	Pos	1.10782	9.13426x10-20	1.42309x10-18	1.30778	8246.02	6305.35
325.17702	748	748-11	HMDB0034028	2-(3,7-Dimethyl-2,6-octadienyl)-4-hydroxy-6-methoxyacetophenone	Organooxygen compounds	C19H26O3	+Na	1.34948	Pos	1.10782	9.13426x10-20	1.42309x10-18	1.30778	8246.02	6305.35
325.17702	748	748-3	HMDB0003955	19-Hydroxyandrost-4-ene-3,17-dione	Steroids and steroid derivatives	C19H26O3	+Na	1.34948	Pos	1.10782	9.13426x10-20	1.42309x10-18	1.30778	8246.02	6305.35
325.17702	748	748-14	HMDB0039568	Ginsenoyne H	Carboxylic acids and derivatives	C19H26O3	+Na	1.34948	Pos	1.10782	9.13426x10-20	1.42309x10-18	1.30778	8246.02	6305.35
325.17702	748	748-1	HMDB0000380	2-Hydroxyestradiol-3-methyl ether	Carboxylic acids and derivatives	C19H26O3	+Na	1.34948	Pos	1.10782	9.13426x10-20	1.42309x10-18	1.30778	8246.02	6305.35
325.17702	748	748-16	HMDB0041204	Acetylpanaxydol	Carboxylic acids and derivatives	C19H26O3	+Na	1.34948	Pos	1.10782	9.13426x10-20	1.42309x10-18	1.30778	8246.02	6305.35
325.17702	748	748-6	HMDB0006773	11b-Hydroxyandrost-4-ene-3,17-dione	Oxazinanes	C19H26O3	+Na	1.34948	Pos	1.10782	9.13426x10-20	1.42309x10-18	1.30778	8246.02	6305.35
325.17702	748	748-29	HMDB0260174	(8R,9S,10R,13S,14S,17S)-17-Hydroxy-10,13-dimethyl-6,7,8,9,11,12,14,15,16,17-decahydro-1H-cyclopenta[a]phenanthrene-2,3-dione	Steroids and steroid derivatives	C19H26O3	+Na	1.34948	Pos	1.10782	9.13426x10-20	1.42309x10-18	1.30778	8246.02	6305.35
325.17702	748	748-26	HMDB0257882	(8R,9S,13S,14S,17S)-13-Methyl-3-methylperoxy-6,7,8,9,11,12,14,15,16,17-decahydrocyclopenta[a]phenanthren-17-ol	Steroids and steroid derivatives	C19H26O3	+Na	1.34948	Pos	1.10782	9.13426x10-20	1.42309x10-18	1.30778	8246.02	6305.35
325.17702	748	748-27	HMDB0258073	(8S,9R,10R,13S,14S)-11-Hydroxy-10,13-dimethyl-5,6,7,8,9,11,12,14,15,16-decahydro-4H-cyclopenta[a]phenanthrene-3,17-dione	Steroids and steroid derivatives	C19H26O3	+Na	1.34948	Pos	1.10782	9.13426x10-20	1.42309x10-18	1.30778	8246.02	6305.35
325.17702	748	748-28	HMDB0258855	Testololactone	Naphthopyrans	C19H26O3	+Na	1.34948	Pos	1.10782	9.13426x10-20	1.42309x10-18	1.30778	8246.02	6305.35
325.17702	748	748-2	HMDB0000405	2-Methoxyestradiol	Steroids and steroid derivatives	C19H26O3	+Na	1.34948	Pos	1.10782	9.13426x10-20	1.42309x10-18	1.30778	8246.02	6305.35
203.22253	320	320-1	HMDB0001256	Spermine	Organonitrogen compounds	C10H26N4	+H	2.49773	Pos	1.10775	5.74857x10-20	9.22345x10-19	1.40925	6392.28	4535.94
669.56178	1936	1936-1	HMDB0290224	CE(20:4(6E,8Z,11Z,14Z)+=O(5))	Unclassified	C47H74O3	+H-H2O	0.265456	Pos	1.10229	1.43051x10-13	1.12248x10-12	0.372468	1311.22	3520.37
669.56178	1936	1936-3	HMDB0290231	CE(20:5(5Z,8Z,11Z,14Z,16E)-OH(18R))	Unclassified	C47H74O3	+H-H2O	0.265456	Pos	1.10229	1.43051x10-13	1.12248x10-12	0.372468	1311.22	3520.37
669.56178	1936	1936-5	HMDB0290233	CE(20:5(5Z,8Z,10E,14Z,17Z)-OH(12))	Unclassified	C47H74O3	+H-H2O	0.265456	Pos	1.10229	1.43051x10-13	1.12248x10-12	0.372468	1311.22	3520.37
669.56178	1936	1936-6	HMDB0290234	CE(20:5(6E,8Z,11Z,14Z,17Z)-OH(5))	Unclassified	C47H74O3	+H-H2O	0.265456	Pos	1.10229	1.43051x10-13	1.12248x10-12	0.372468	1311.22	3520.37
669.56178	1936	1936-4	HMDB0290232	CE(20:5(5Z,8Z,11Z,14Z,16E)-OH(18))	Unclassified	C47H74O3	+H-H2O	0.265456	Pos	1.10229	1.43051x10-13	1.12248x10-12	0.372468	1311.22	3520.37
669.56178	1936	1936-2	HMDB0290225	CE(20:4(5Z,8Z,11Z,13E)+=O(15))	Unclassified	C47H74O3	+H-H2O	0.265456	Pos	1.10229	1.43051x10-13	1.12248x10-12	0.372468	1311.22	3520.37
625.33599	1525	1525-1	HMDB0251755	Elsibucol	Benzene and substituted derivatives	C35H54O4S2	+Na	0.670146	Pos	1.09341	1.43046x10-13	1.12248x10-12	0.352979	1180.14	3343.37
705.13053	2141	2141-1	HMDB0037460	Tricin 7-diglucuronoside	Flavonoids	C29H30O19	+Na	4.35762	Pos	1.09087	3.90709x10-19	5.75359x10-18	1.41415	6778.92	4793.63
664.54124	1904	1904-1	HMDB0012096	SM(d30:1)	Sphingolipids	C35H71N2O6P	+NH4	3.55348	Pos	1.09022	3.73933x10-16	3.94096x10-15	0.318723	971.807	3049.07
148.00342	125	125-1	HMDB0000251	Taurine	Organic sulfonic acids and derivatives	C2H7NO3S	+Na	3.14863	Pos	1.08952	2.06153x10-20	3.51769x10-19	0.677182	3622.54	5349.43
217.04689	375	375-1	HMDB0000954	Ferulic acid	Cinnamic acids and derivatives	C10H10O4	+Na	1.0955	Pos	1.06483	8.83767x10-15	8.05127x10-14	1.20048	12885.1	10733.3
891.46925	2732	2732-1	HMDB0062485	Lc3Cer	Sphingolipids	C40H72N2O18	+Na	2.18634	Pos	1.05825	3.86048x10-14	3.29366x10-13	0.370803	1188.47	3205.12
844.52214	2668	2668-1	HMDB0007991	PC(38:6)	Glycerophospholipids	C46H80NO8P	+K	3.92295	Pos	1.05786	3.83527x10-18	5.21887x10-17	1.94414	3598.23	1850.81
759.64089	2414	2414-1	HMDB0036290	Campesteryl brassidate	Steroids and steroid derivatives	C50H88O2	+K	0.924884	Pos	1.05712	4.87715x10-19	6.89860x10-18	0.324503	841.154	2592.13
173.05698	212	212-1	HMDB0000764	Hydrocinnamic acid	Phenylpropanoic acids	C9H10O2	+Na	2.12835	Pos	1.04703	6.27052x10-15	5.86157x10-14	1.23381	10928.2	8857.27
173.05698	212	212-3	HMDB0002237	3,4-Dimethylbenzoic acid	Benzene and substituted derivatives	C9H10O2	+Na	2.12835	Pos	1.04703	6.27052x10-15	5.86157x10-14	1.23381	10928.2	8857.27
173.05698	212	212-2	HMDB0002222	3-Methylphenylacetic acid	Benzene and substituted derivatives	C9H10O2	+Na	2.12835	Pos	1.04703	6.27052x10-15	5.86157x10-14	1.23381	10928.2	8857.27
173.05698	212	212-4	HMDB0011743	2-Phenylpropionate	Phenylpropanoic acids	C9H10O2	+Na	2.12835	Pos	1.04703	6.27052x10-15	5.86157x10-14	1.23381	10928.2	8857.27
557.09424	924	924-1	HMDB0257286	Rocepafant	Thienodiazepines	C26H23ClN6OS2	+Na	2.40594	Pos	1.03162	3.24748x10-16	3.49104x10-15	1.26512	8904.6	7038.56
788.41696	2533	2533-1	HMDB0252925	L-Methioninamide, N-(5-amino-1-oxopentyl)-L-phenylalanyl-L-phenylalanyl-L-prolyl-N-methyl-L-leucyl-	Peptidomimetics	C40H59N7O6S	+Na	3.77896	Pos	1.02996	6.82377x10-14	5.55724x10-13	0.398542	1309.93	3286.81
748.38370	2363	2363-1	HMDB0262677	PA(10:0/LTE4)	Unclassified	C36H62NO11PS	+H	2.26351	Pos	1.02105	4.00231x10-15	3.84150x10-14	0.335942	924.282	2751.31
748.38370	2363	2363-2	HMDB0262678	PA(LTE4/10:0)	Unclassified	C36H62NO11PS	+H	2.26351	Pos	1.02105	4.00231x10-15	3.84150x10-14	0.335942	924.282	2751.31
880.46223	2719	2719-1	HMDB0033805	Azaspiracid	Azaspirodecane derivatives	C47H71NO12	+K	1.53289	Pos	1.01971	1.65181x10-12	1.12386x10-11	0.349213	1044.47	2990.94
225.05172	411	411-1	HMDB0247512	7-Methyl-6,8-bis(methylthio)pyrrolo(1,2-a)pyrazine	Pyrrolopyrazines	C10H12N2S2	+H	1.08979	Pos	1.01449	3.61484x10-15	3.53269x10-14	1.24571	9605.56	7710.91
643.34501	1716	1716-2	HMDB0041049	Physagulin D	Steroids and steroid derivatives	C34H52O10	+Na	0.402657	Pos	1.01365	2.86522x10-13	2.13897x10-12	0.356073	1069.74	3004.27
643.34501	1716	1716-1	HMDB0030011	(1alpha,3beta,20S,22R,24S,25S)-Pubescenin	Prenol lipids	C34H52O10	+Na	0.402657	Pos	1.01365	2.86522x10-13	2.13897x10-12	0.356073	1069.74	3004.27
283.12975	645	645-1	HMDB0036456	10-Hydroxy-3-methoxy-1,3,5,7-cadinatetraen-9-one	Prenol lipids	C16H20O3	+Na	2.55509	Pos	1.01199	1.84293x10-21	3.66880x10-20	1.32866	6347.73	4777.56
726.57854	2257	2257-2	HMDB0011151	PC(O-34:2)	Glycerophospholipids	C42H82NO7P	+H-H2O	2.96952	Pos	1.00909	4.42199x10-13	3.21192x10-12	0.41726	1282.22	3072.96
726.57854	2257	2257-1	HMDB0007996	PC(16:1)	Glycerophospholipids	C42H82NO7P	+H-H2O	2.96952	Pos	1.00909	4.42199x10-13	3.21192x10-12	0.41726	1282.22	3072.96
m/z, mass-to-charge ratio; VIP, variable importance in projection; FC, fold change; Neg, negative; Pos, positive; SCI, spinal cord injury; PPM, parts per million.
